# Supplementary material for: A phylo-functional core of gut microbiota in healthy young Chinese cohorts across lifestyles, geography and ethnicities
Source: PubMed Central journal article supplement — ISME J. 2015 Feb 3;9(9):1979–90. doi: 10.1038/ismej.2015.11 (PMC4542028; doi:10.1038/ismej.2015.11), 2015-02-03
Supplement: ismej201511x1.pdf [file ismej201511x1.pdf]

1 **Supplementary Information**

2 **A phylo-functional core of gut microbiota in healthy young Chinese cohorts**  
3 **across lifestyles, geography and ethnicities**

4  
5 Jiachao Zhang<sup>1,5</sup>, Zhuang Guo<sup>2,5</sup>, Zhengsheng Xue<sup>3,5</sup>, Zhihong Sun<sup>1,5</sup>, Menghui Zhang<sup>3,5</sup>, Lifeng  
6 Wang<sup>1</sup>, Guoyang Wang<sup>3</sup>, Fang Wang<sup>1</sup>, Jie Xu<sup>1</sup>, Hongfang Cao<sup>1</sup>, Haiyan Xu<sup>1</sup>, Qiang Lv<sup>1</sup>, Zhi Zhong<sup>1</sup>,  
7 Yongfu Chen<sup>1</sup>, Sudu Qimuge<sup>1</sup>, Bilige Menghe<sup>1</sup>, Yi Zheng<sup>1</sup>, Liping Zhao<sup>3,4</sup>, Wei Chen<sup>2</sup>, Heping  
8 Zhang<sup>1</sup>

9  
10 This supplementary document includes:

11 Supplementary Materials and Methods

12 Supplementary Discussion

13 Supplementary Figures S1-S9

14 Supplementary Tables S1-S7

15 Supplementary References

16

17

## 18 **Supplementary Materials and Methods**

19 For each fecal sample, genomic DNA was extracted within 24 hours after arriving at the laboratory.  
20 Bead-beating extraction and phenol-chloroform purification were used to extract DNA (Dethlefsen  
21 and Relman 2011). The quality of extracted DNA was assessed by 0.8% agarose gel electrophoresis  
22 and the ratio of optical density (OD) at 260/280 was measured by spectrophotometry. All DNA  
23 samples were stored at -20 °C until further processing.

24

25 The V5-V6 region of 16S rRNA genes was amplified by PCR for bar-coded pyrosequencing. A set  
26 of 7-nucleotide barcodes was added to the universal forward primer U789F  
27 (5'-TAGATACCCSSGTAGTCC-3') and reverse primer U1068R (5'-CTGACGRCRGCCATGC-3'),  
28 which targeted *Bacteria* and *Archaea* (Lee et al 2011). PCR amplification was performed with 50 ng  
29 template DNA (NanoDrop) in 50 µL reactions containing 5 µL 10 × PCR buffer (TaKaRa, Japan), 2  
30 µL deoxynucleoside triphosphate (5 mmol/L), 0.5 µL Taq polymerase (5 U/µL; TaKaRa, Japan), and  
31 1 µL of each primer (10 µmol/L). PCR reactions were performed on a PCR system (94 °C for 5 min;  
32 30 cycles of 94 °C for 45 s, 55 °C for 40 s, and 72 °C for 1 min; and a final extension of 72 °C for 7  
33 min) (Dethlefsen and Relman 2011). Quantification of the PCR products was performed using the  
34 Agilent DNA 1000 kit and Agilent 2100 Bioanalyzer (Agilent Technologies, Palo Alto, California)  
35 according to the manufacturer's instructions.

36

37 Raw pyrosequencing reads were considered as bad-quality sequences according to the following  
38 criteria and were excluded from the subsequent analyses: The length of the raw read was shorter than  
39 110 nt or the length of the variable region was shorter than 100 nt; the read sequence lacked a perfect  
40 BLAST match to the barcode or a fuzzy match to at least one end of the 16S rRNA gene primers; the  
41 proportion of bases with a low-quality score (<20) was larger than 7% in the raw read.

42

43 The extracted high-quality sequences were first aligned using PyNAST (Caporaso et al 2010) and  
44 then clustered into 1,318,505 unique representative sequences under 100% sequence identity using  
45 UCLUST (Edgar 2010). The unique sequence set was further classified into 97,313 operational  
46 taxonomic units (OTUs) under the threshold of 97% identity. After being identified as chimera by  
47 ChimeraSlayer (Haas et al 2011), 27,792 OTUs were discarded. To minimize the number of spurious  
48 OTUs generated from sequencing error, we removed a total of 32,603 OTUs that occurred only once  
49 and twice across all samples. As a result, 36,918 OTUs representing 4,406,917 sequences in total  
50 were included for subsequent analysis. A *de novo* phylogenetic tree was constructed using the OTU  
51 representative set in FastTree (Price et al 2009). The taxonomy of each 97% OTU representative  
52 sequence was first assigned using the Ribosomal Database Project (RDP) Classifier (Cole et al 2007)  
53 with a minimum bootstrap threshold of 80%. Considering the relatively short length of the V5-V6  
54 region of 16S rRNA genes, the sequences that could not be assigned by RDP Classifier at each  
55 taxonomic level were further searched using BLASTN against the reference database downloaded  
56 from the NCBI archaeal and bacterial 16S Ribosomal RNA RefSeq Targeted Loci Project. The query  
57 sequence would be assigned to the corresponding taxonomic group that the reference sequence  
58 belonged to only if the sequence identity of the query to the reference sequence was higher than the  
59 defined threshold at the specific taxonomic rank (95%, 92%, 91%, 85%, and 75% for genus, family,  
60 order, class, and phylum, respectively).

61

62 The number of the observed OTUs and Shannon diversity indices were used to estimate the alpha  
63 diversity in each sample. Euclidean metric as well as the UniFrac metrics (Lozupone and Knight  
64 2005, Lozupone et al 2007) were used in principal coordinates analysis (PCoA) and Unweighted Pair  
65 Group Method with Arithmetic Mean (UPGMA) clustering.

66

67

## 68 **Supplementary Discussion**

69 Compared with the strong lifestyle-associated differentiation in gut microbiota structure in the  
70 Mongol ethnic group, such effect appeared variable across geography for the Han individuals. In  
71 China, the rural development, modernization, and urbanization occurring in various locations were  
72 generally not synchronous due to the economic inequalities between different areas, with the more  
73 prosperous region tending to make greater efforts to improve the quality of life of their rural  
74 populations. As a result, the gap between rural and urban cohorts in these areas may have become  
75 smaller. In this study, the lifestyle-associated differentiation in gut microbiota structure of the Han  
76 people was much more significant in the cohorts living in Harbin and Zhengzhou, than those in Wuxi  
77 and Chengdu. According to the latest local statistical yearbooks released in the four provinces (i.e.,  
78 Heilongjiang, Henan, Jiangsu, and Sichuan) in 2012, the gross domestic product (GDP) values for  
79 Harbin, Zhengzhou, Wuxi, and Chengdu were 4242.2, 4979.9, 6880.2, and 6950.6 ( $\times 10^8$  Chinese  
80 Yuan), respectively (Heilongjiang and Heilongjiang 2012, Henan and Henan 2012, Jiangsu and  
81 Jiangsu 2012, Sichuan and Sichuan 2012). As a measure for the economic status, the higher GDP  
82 value may indicate a better local economic status. Therefore, these data may suggest the potential  
83 association between the local economic status and the degree of lifestyle-associated segregation of  
84 gut microbiota structure in the Han ethnic group across geography.

85

86 *Phascolarctobacterium*, the most predominant but also the most variable genus in this study, showed  
87 poor associations with other prevalent or core phylotypes, but significantly co-occurred with one  
88 lineage from *Klebsiella* (Supplementary Figure S8). It was reported that *Phascolarctobacterium* can  
89 grow as satellite colonies around colonies of succinate-producing *Escherichia coli* cells (Dot et al  
90 1993), which belongs to the same *Enterobacteriaceae* family like *Klebsiella*. It appeared to be  
91 capable of utilizing only succinate as the carbon substrate to produce propionate (Dot et al 1993) and  
92 may adapt to the intestinal environment by specializing in the fermentation of the succinate

93 generated by other bacterial species, such as the succinate-producing bacterium *Paraprevotella*  
94 *xylaniphila* (Watanabe et al 2012). Therefore, the growth of *Phascolarctobacterium* in this study was  
95 assumed to be supported by other co-predominant succinate-producing symbionts such as  
96 *Bacteroides* and *Prevotella*, which were able to produce succinate (Shah and Collins 1989, Shah and  
97 Collins 1990). In this study, *Phascolarctobacterium* had a weak positive correlation with *Bacteroides*  
98 ( $\rho = 0.144$ ), although it was not significant after controlling for the false discovery rate (FDR) in  
99 this study (Figure 5, unadjusted  $P = 0.011$  and FDR = 4.2%). Biochemical experiments and  
100 ecological studies are needed to further characterize the interaction between *Phascolarctobacterium*  
101 and other gut bacteria.

102

103

104 **Supplementary Figures**

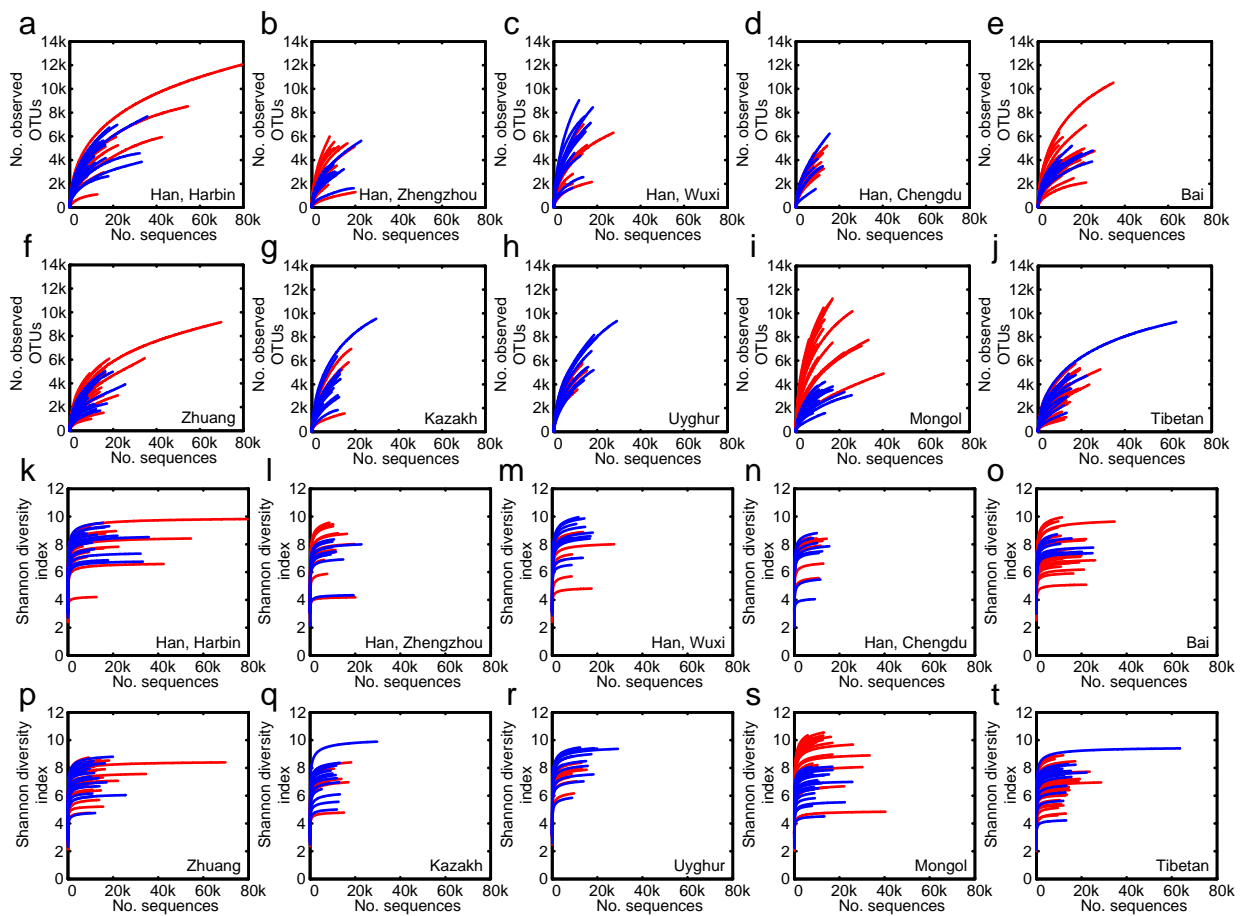

105

106 **Supplementary Figure S1** OTU-level rarefaction (observed richness) (a-j) and Shannon diversity

107 index (k-t) curves of gut microbiota of the Chinese cohorts. Red and blue curves represent rural and

108 urban individuals, respectively.

109

110

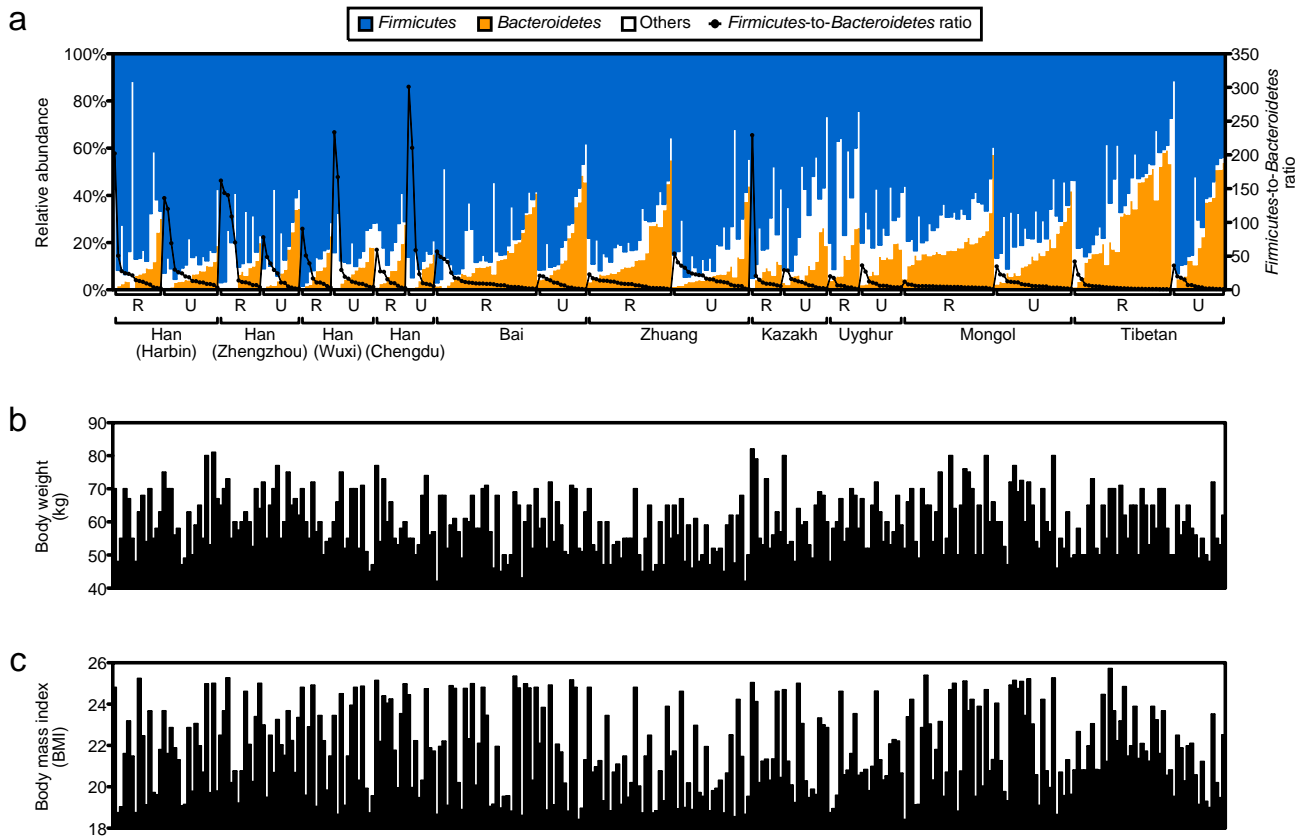

111

112 **Supplementary Figure S2** Variations of (a) relative abundance of *Firmicutes* and *Bacteroidetes*, (b)  
 113 body weight, and (c) body mass index (BMI) across the 314 investigated individuals. Individuals in  
 114 each cohort are arranged according to the *Firmicutes-to-Bacteroidetes* ratio. R, rural cohorts; U,  
 115 urban cohorts.

116

117

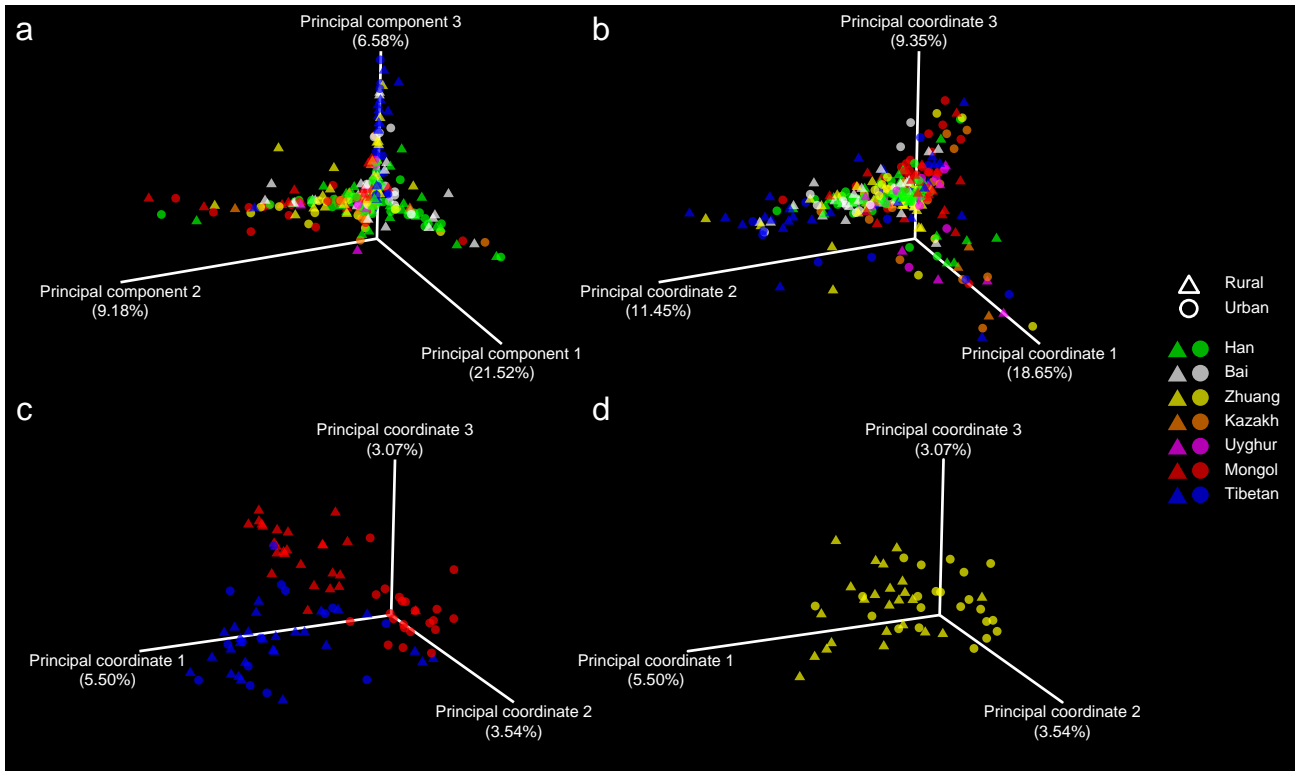

118

119 **Supplementary Figure S3** Large structural variation of gut microbiota of the 314 individuals  
 120 included in this study. **(a)** PCA. **(b)** Weighted UniFrac PCoA. **(c)** Unweighted UniFrac PCoA, which  
 121 shows structural segregation between the Mongol and Tibetan ethnic groups, as well as between the  
 122 rural and urban Mongol cohorts. **(d)** Unweighted UniFrac PCoA, which shows structural segregation  
 123 between the rural and urban Zhuang cohorts. All the 36,918 OTUs are used for PCA and PCoA in  
 124 **(a-d)**.

125

126



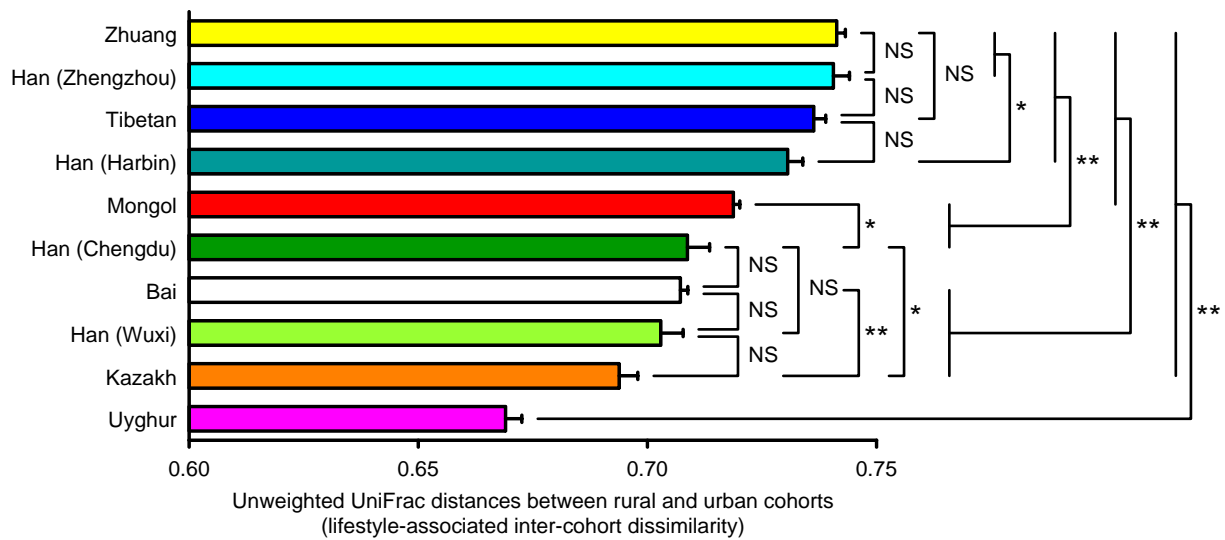

127

128 **Supplementary Figure S4** The lifestyle-associated dissimilarity of gut microbiota structure between  
 129 the rural and urban cohorts with identical ethnicities and geographical locations. Mean  $\pm$  S.E.M.  
 130 values are plotted.  $P$  values represent the proportion of permuted differences greater than real  
 131 differences (Student's  $t$ -test with 1,000 Monte Carlo simulations). NS, not significant;  $P > 0.05$ ,  $*P$   
 132  $< 0.05$ , and  $**P < 0.005$ .

133

134

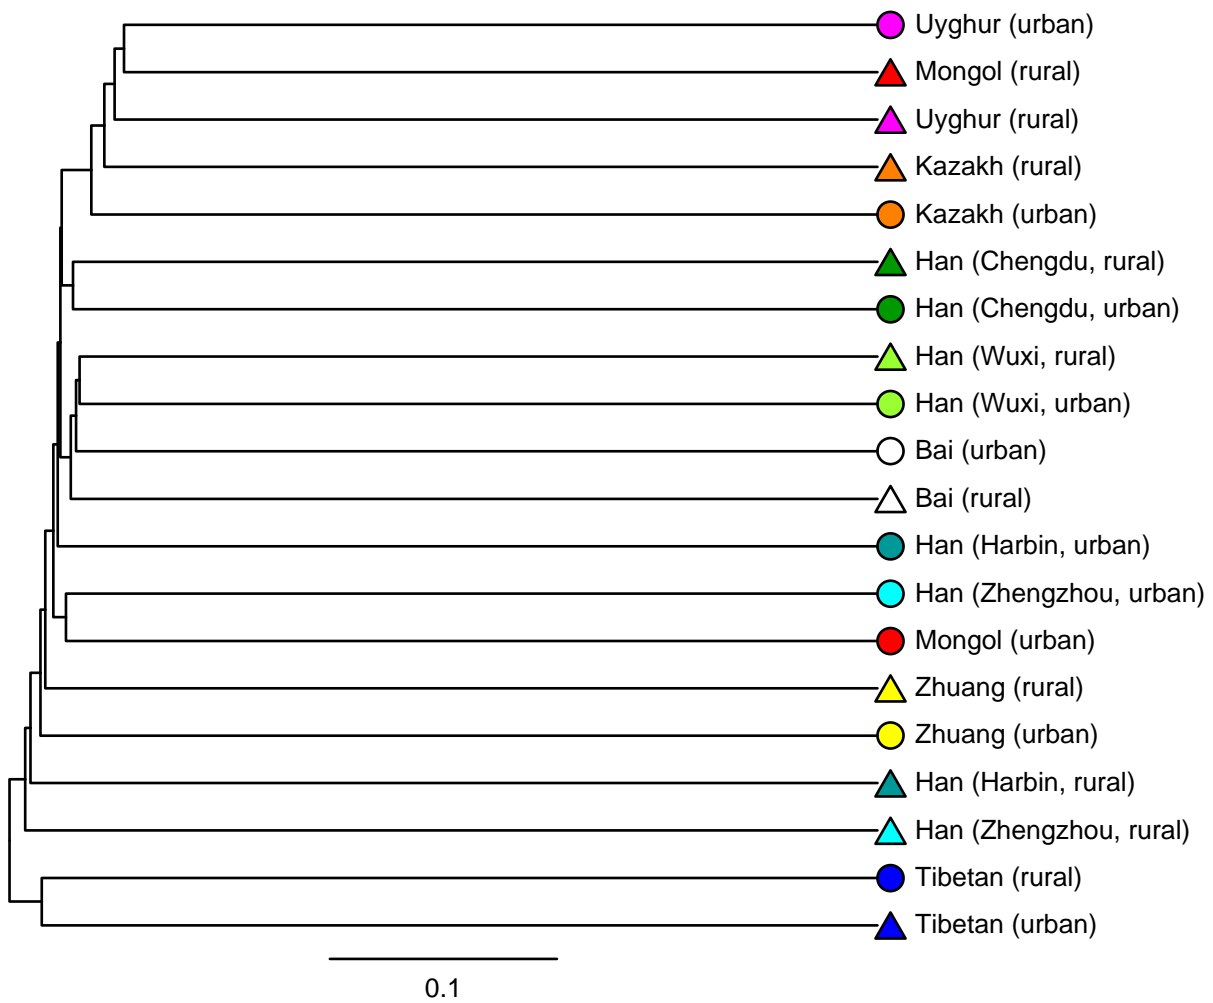

135

136 **Supplementary Figure S5** UPGMA hierarchical clustering tree based on the average unweighted

137 UniFrac distances among the cohorts.

138

139

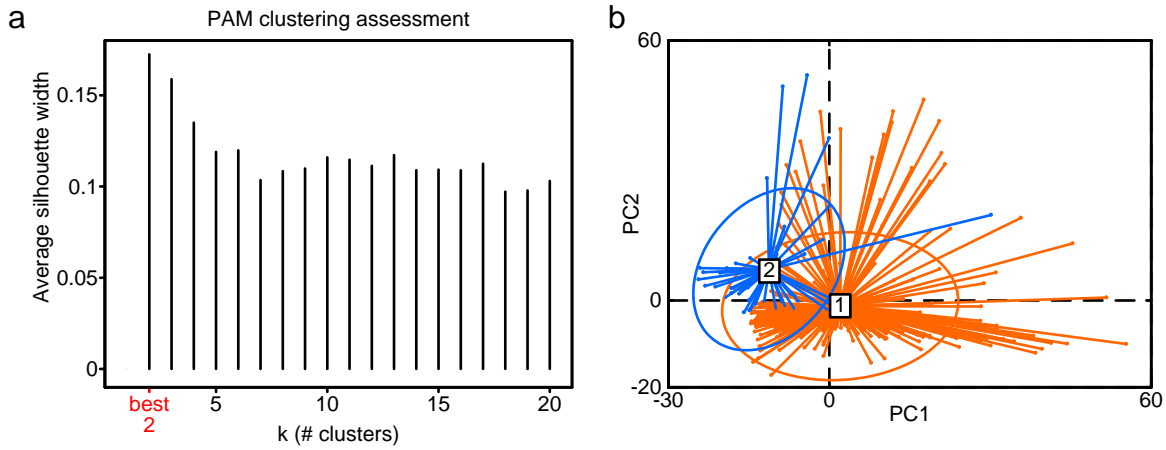

140

141 **Supplementary Figure S6** Enterotype analysis. **(a)** PAM clustering validation using the average  
 142 silhouette width reveals that although gut microbiota composition of the 314 Chinese individuals are  
 143 most naturally separated into two clusters, the average silhouette width was poorly supported. **(b)**  
 144 Between-class analysis, which visualizes results from PCA and clustering, reveals two overlapping  
 145 clusters. The colored ellipses cover 67% of the samples belonging to the corresponding cluster.

146

147

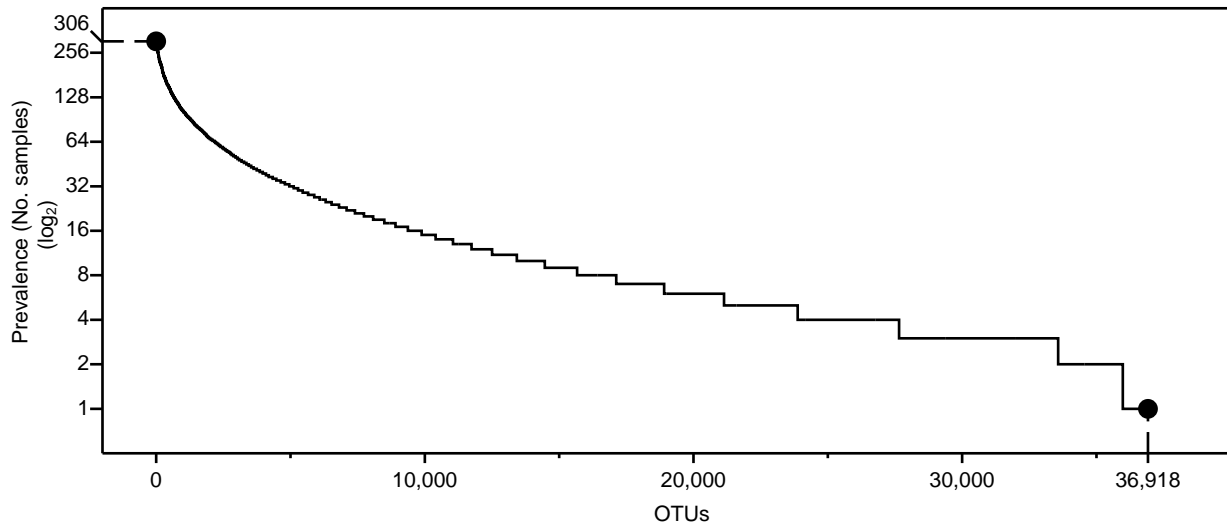

148

149 **Supplementary Figure S7** Distribution of OTUs as a function of their prevalence in the 314  
150 individuals. OTUs are ranked from the most-prevalent (present in 306 out of 314 individuals) to the  
151 least-prevalent (present in only one individual) OTU.

152

153

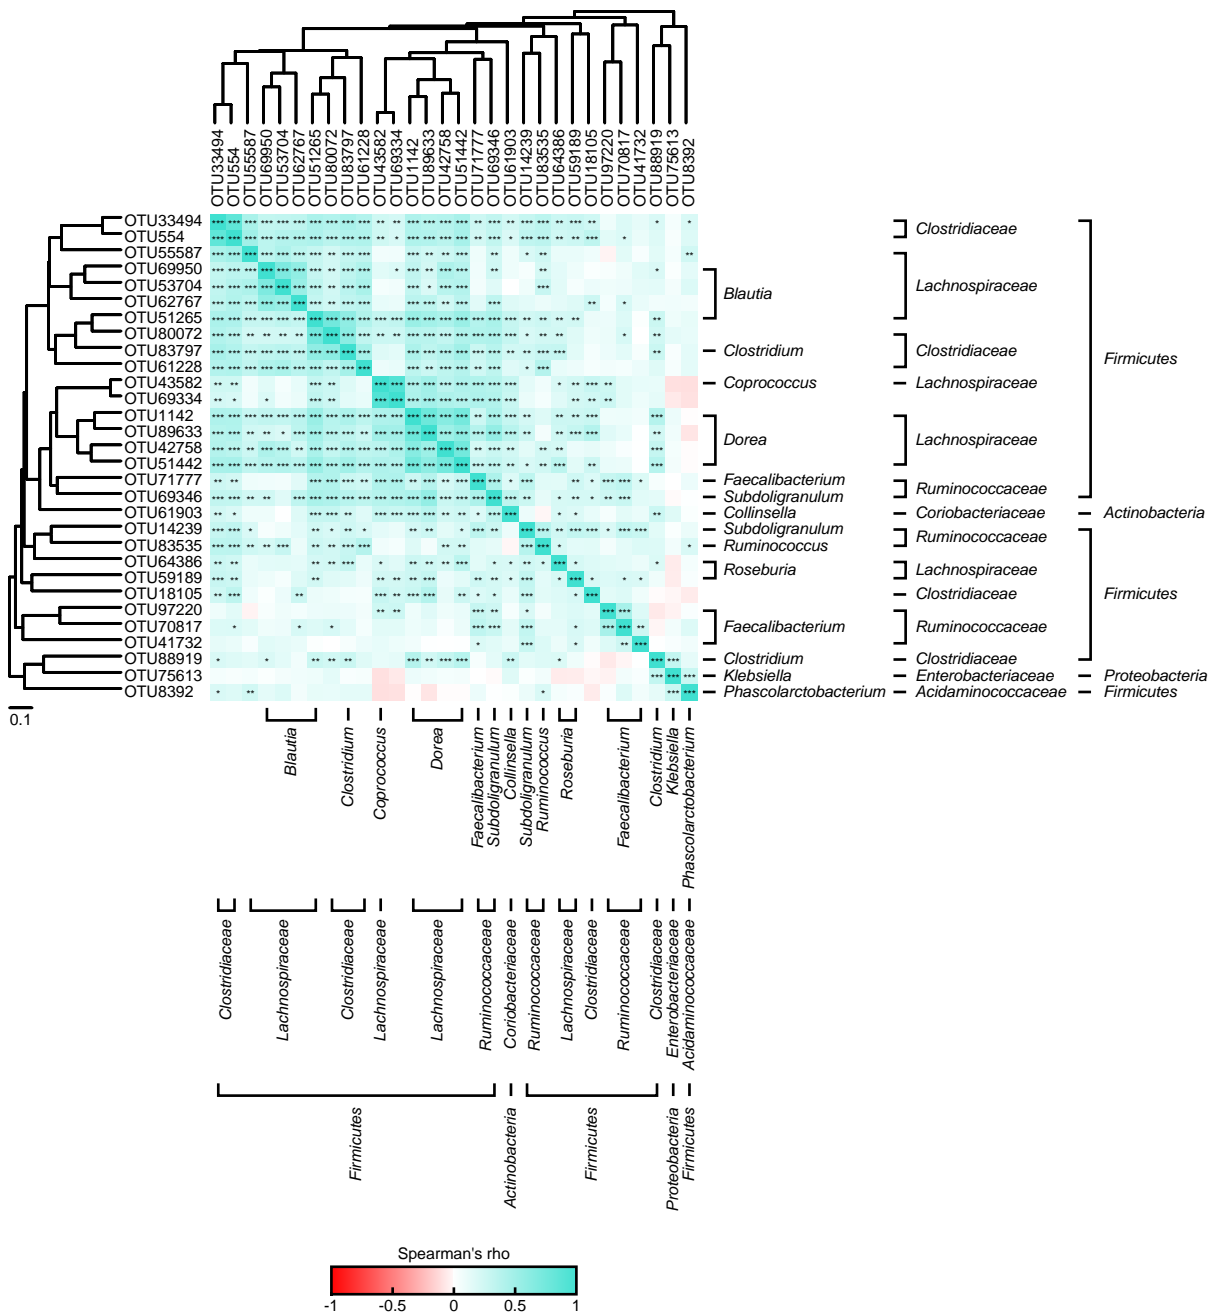

154

155 **Supplementary Figure S8** Co-occurrence patterns among the thirty most-prevalent OTUs across the  
 156 314 samples. The correlations were controlled for multiple testing and only those with FDRs <1%  
 157 were retained. The significant correlations were subsequently converted to correlation distance  
 158 matrices and the OTUs were clustered using the UPGMA hierarchical clustering method. \*FDR  
 159 <0.01, \*\*FDR <0.001, and \*\*\*FDR <10<sup>-5</sup>.

160

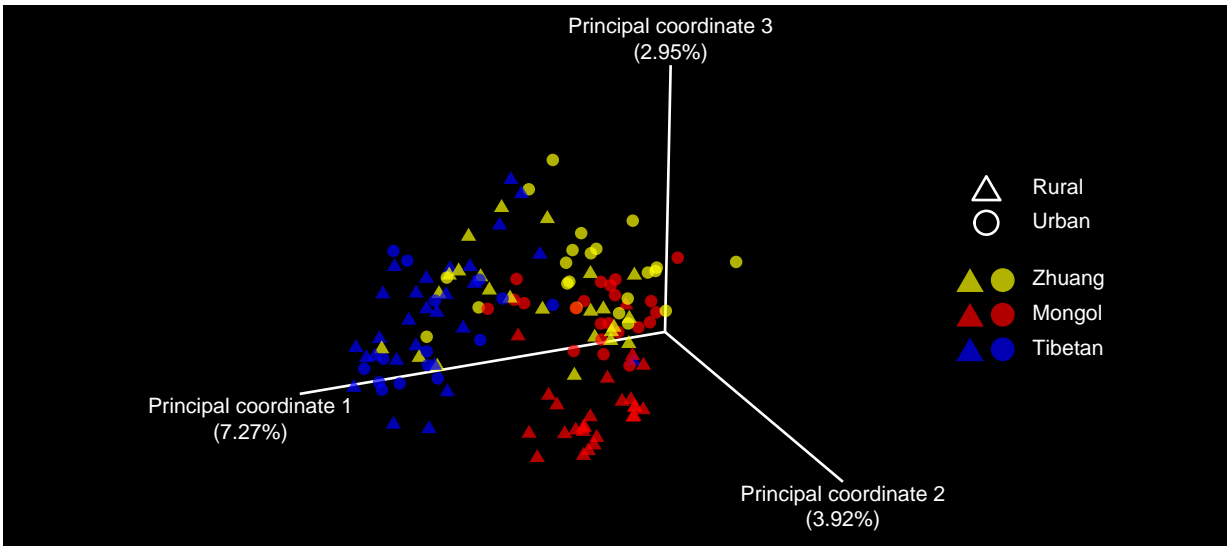

161

162 **Supplementary Figure S9** Unweighted UniFrac PCoA of the cohorts from the Mongol, Tibetan, and

163 Zhuang ethnic groups using the 10,937 OTUs assigned to the nine core genera.

164

165

166 **Supplementary Tables**167 **Supplementary Table S1** The 20 cohorts included in this study.

| Ethnic group | Province       | Sampling site                                                         |                                                     | Sample size (n) | Individual ratio (n/n) |             |
|--------------|----------------|-----------------------------------------------------------------------|-----------------------------------------------------|-----------------|------------------------|-------------|
|              |                | Urban                                                                 | Rural                                               |                 | Female/Male            | Urban/Rural |
| Han          | Heilongjiang   | Daoli/Daowai/Songbei/Nangang District of Harbin                       |                                                     | 30              | 13/17                  | 16/14       |
|              | Henan          | Jinshui/Zhongyuan District of Zhengzhou                               |                                                     | 23              | 9/14                   | 11/12       |
|              | Jiangsu        | Beitang/Chongan District of Wuxi                                      |                                                     | 21              | 13/8                   | 12/9        |
|              | Sichuan        | Wuhou District of Chengdu                                             |                                                     | 17              | 12/5                   | 8/9         |
| Bai          | Yunnan         | Panlong District/Xishan District of Kunming and Eryuan County of Dali |                                                     | 43              | 19/24                  | 14/29       |
| Kazakh       | Xinjiang       | Shuimogou/Tianshan District of Urumqi                                 |                                                     | 22              | 13/9                   | 13/9        |
| Mongol       | Inner Mongolia | Saihan District of Hohhot                                             | Bordered Yellow/Bordered White Banner of Xilinguole | 48              | 25/23                  | 22/26       |
| Tibetan      | Tibetan        | Chengguan District of Lhasa                                           |                                                     | 43              | 21/22                  | 15/28       |
| Uygur        | Xinjiang       | Shuimogou/Tianshan District of Urumqi                                 |                                                     | 21              | 10/11                  | 12/9        |
| Zhuang       | Guangxi        | Xingning/Xixiangtang District of Nanning                              |                                                     | 46              | 22/24                  | 22/24       |
| Total        |                |                                                                       |                                                     | 314             | 157/157                | 145/169     |

168

| Sample ID | Ethnicity | Lifestyle | Sex    | Sampling site                                                     | Age (y) | Body height (m) | Body weight (kg) | BMI   | Pyrosequencing Run | No. Extracted Sequences | No. Non-chimera Sequences | No. OTUs | No. OTUs occurred only once or twice in all samples | No. Phyla | No. Classes | No. Orders | No. Families | No. Genera |
|-----------|-----------|-----------|--------|-------------------------------------------------------------------|---------|-----------------|------------------|-------|--------------------|-------------------------|---------------------------|----------|-----------------------------------------------------|-----------|-------------|------------|--------------|------------|
| FYN10     | Bai       | Rural     | Female | Eryuan County, Dali Bai Autonomous Prefecture, Yunnan Province    | 35      | 1.68            | 70               | 24.8  | 8                  | 6635                    | 6130                      | 1196     | 26                                                  | 7         | 11          | 13         | 31           | 70         |
| FYN14     | Bai       | Rural     | Female | Eryuan County, Dali Bai Autonomous Prefecture, Yunnan Province    | 33      | 1.54            | 59               | 24.88 | 8                  | 15680                   | 14896                     | 1579     | 39                                                  | 11        | 16          | 17         | 33           | 78         |
| FYN15     | Bai       | Rural     | Female | Eryuan County, Dali Bai Autonomous Prefecture, Yunnan Province    | 31      | 1.55            | 60               | 24.97 | 9                  | 18638                   | 16464                     | 1276     | 51                                                  | 7         | 14          | 16         | 33           | 65         |
| FYN16     | Bai       | Rural     | Female | Eryuan County, Dali Bai Autonomous Prefecture, Yunnan Province    | 34      | 1.62            | 65               | 24.77 | 9                  | 17866                   | 15952                     | 2050     | 81                                                  | 9         | 15          | 19         | 39           | 88         |
| FYN17     | Bai       | Rural     | Female | Eryuan County, Dali Bai Autonomous Prefecture, Yunnan Province    | 34      | 1.64            | 60               | 22.31 | 9                  | 12291                   | 10680                     | 1606     | 54                                                  | 11        | 16          | 21         | 42           | 78         |
| FYN22     | Bai       | Rural     | Female | Eryuan County, Dali Bai Autonomous Prefecture, Yunnan Province    | 32      | 1.57            | 61               | 24.75 | 10                 | 24900                   | 22386                     | 3811     | 316                                                 | 11        | 18          | 17         | 35           | 73         |
| FYN23     | Bai       | Rural     | Female | Eryuan County, Dali Bai Autonomous Prefecture, Yunnan Province    | 24      | 1.57            | 61               | 24.75 | 10                 | 12345                   | 9775                      | 2807     | 196                                                 | 10        | 17          | 21         | 41           | 86         |
| FYN18     | Bai       | Rural     | Male   | Eryuan County, Dali Bai Autonomous Prefecture, Yunnan Province    | 35      | 1.68            | 70               | 24.8  | 9                  | 7922                    | 7071                      | 1012     | 29                                                  | 7         | 12          | 11         | 27           | 56         |
| FYN21     | Bai       | Rural     | Male   | Eryuan County, Dali Bai Autonomous Prefecture, Yunnan Province    | 33      | 1.65            | 68               | 24.98 | 9                  | 45186                   | 35574                     | 6759     | 807                                                 | 11        | 19          | 24         | 47           | 106        |
| FYN24     | Bai       | Rural     | Male   | Eryuan County, Dali Bai Autonomous Prefecture, Yunnan Province    | 32      | 1.76            | 68               | 21.95 | 10                 | 12293                   | 10033                     | 3178     | 288                                                 | 12        | 19          | 24         | 46           | 89         |
| FYN3      | Bai       | Rural     | Male   | Eryuan County, Dali Bai Autonomous Prefecture, Yunnan Province    | 25      | 1.54            | 45               | 18.97 | 7                  | 18863                   | 16457                     | 2162     | 99                                                  | 7         | 13          | 16         | 35           | 71         |
| FYN38     | Bai       | Rural     | Male   | Eryuan County, Dali Bai Autonomous Prefecture, Yunnan Province    | 18      | 1.55            | 47               | 19.56 | 12                 | 22961                   | 21244                     | 1864     | 65                                                  | 8         | 12          | 15         | 33           | 74         |
| FYN7      | Bai       | Rural     | Male   | Eryuan County, Dali Bai Autonomous Prefecture, Yunnan Province    | 33      | 1.65            | 69               | 25.34 | 7                  | 15224                   | 13536                     | 1795     | 85                                                  | 8         | 16          | 20         | 38           | 70         |
| FYN8      | Bai       | Rural     | Male   | Eryuan County, Dali Bai Autonomous Prefecture, Yunnan Province    | 33      | 1.62            | 65               | 24.77 | 8                  | 11869                   | 11014                     | 1279     | 32                                                  | 9         | 14          | 15         | 27           | 51         |
| FYN26     | Bai       | Rural     | Female | Jianchuan County, Dali Bai Autonomous Prefecture, Yunnan Province | 26      | 1.61            | 49               | 18.9  | 10                 | 21450                   | 19741                     | 2202     | 126                                                 | 10        | 14          | 18         | 35           | 77         |
| FYN28     | Bai       | Rural     | Female | Jianchuan County, Dali Bai Autonomous Prefecture, Yunnan Province | 34      | 1.6             | 50               | 19.53 | 10                 | 7862                    | 6531                      | 2274     | 153                                                 | 9         | 15          | 15         | 33           | 70         |
| FYN29     | Bai       | Rural     | Female | Jianchuan County, Dali Bai Autonomous Prefecture, Yunnan Province | 35      | 1.52            | 43               | 18.61 | 11                 | 12953                   | 11037                     | 2479     | 174                                                 | 7         | 16          | 15         | 32           | 68         |
| FYN31     | Bai       | Rural     | Female | Jianchuan County, Dali Bai Autonomous Prefecture, Yunnan Province | 19      | 1.6             | 52               | 20.31 | 11                 | 24642                   | 21492                     | 2824     | 106                                                 | 12        | 17          | 24         | 48           | 96         |
| FYN32     | Bai       | Rural     | Female | Jianchuan County, Dali Bai Autonomous Prefecture, Yunnan Province | 31      | 1.5             | 42               | 18.67 | 11                 | 22663                   | 22141                     | 1171     | 20                                                  | 6         | 12          | 13         | 28           | 54         |
| FYN34     | Bai       | Rural     | Female | Jianchuan County, Dali Bai Autonomous Prefecture, Yunnan Province | 31      | 1.62            | 58               | 22.1  | 11                 | 7078                    | 6169                      | 1470     | 67                                                  | 8         | 13          | 17         | 35           | 68         |
| FYN37     | Bai       | Rural     | Female | Jianchuan County, Dali Bai Autonomous Prefecture, Yunnan Province | 33      | 1.63            | 50               | 18.82 | 12                 | 22023                   | 19074                     | 2167     | 67                                                  | 10        | 15          | 18         | 41           | 83         |
| FYN5      | Bai       | Rural     | Female | Jianchuan County, Dali Bai Autonomous Prefecture, Yunnan Province | 34      | 1.55            | 46               | 19.15 | 7                  | 14660                   | 11678                     | 1849     | 105                                                 | 7         | 13          | 18         | 40           | 80         |
| FYN25     | Bai       | Rural     | Male   | Jianchuan County, Dali Bai Autonomous Prefecture, Yunnan Province | 34      | 1.73            | 57               | 19.05 | 10                 | 14084                   | 11715                     | 3391     | 235                                                 | 11        | 17          | 19         | 42           | 87         |
| FYN27     | Bai       | Rural     | Male   | Jianchuan County, Dali Bai Autonomous Prefecture, Yunnan Province | 32      | 1.7             | 58               | 20.07 | 10                 | 8873                    | 7279                      | 2475     | 166                                                 | 9         | 17          | 17         | 36           | 69         |
| FYN30     | Bai       | Rural     | Male   | Jianchuan County, Dali Bai Autonomous Prefecture, Yunnan Province | 35      | 1.75            | 68               | 22.2  | 11                 | 32894                   | 26285                     | 2804     | 206                                                 | 11        | 15          | 19         | 41           | 94         |
| FYN33     | Bai       | Rural     | Male   | Jianchuan County, Dali Bai Autonomous Prefecture, Yunnan Province | 32      | 1.68            | 57               | 20.2  | 11                 | 6801                    | 6254                      | 1183     | 22                                                  | 8         | 11          | 12         | 26           | 47         |
| FYN35     | Bai       | Rural     | Male   | Jianchuan County, Dali Bai Autonomous Prefecture, Yunnan Province | 31      | 1.76            | 68               | 21.95 | 11                 | 21612                   | 20139                     | 2509     | 109                                                 | 9         | 14          | 18         | 36           | 82         |
| FYN40     | Bai       | Rural     | Male   | Jianchuan County, Dali Bai Autonomous Prefecture, Yunnan Province | 34      | 1.65            | 52               | 19.1  | 12                 | 13812                   | 12856                     | 1657     | 30                                                  | 9         | 12          | 14         | 31           | 54         |
| FYN43     | Bai       | Rural     | Male   | Jianchuan County, Dali Bai Autonomous Prefecture, Yunnan Province | 18      | 1.74            | 71               | 23.45 | 12                 | 7574                    | 6645                      | 1539     | 47                                                  | 7         | 13          | 13         | 29           | 60         |
| FYN1      | Bai       | Urban     | Male   | Eryuan County, Dali Bai Autonomous Prefecture, Yunnan Province    | 31      | 1.7             | 72               | 24.91 | 7                  | 9966                    | 8549                      | 1811     | 73                                                  | 9         | 15          | 20         | 34           | 73         |
| FYN4      | Bai       | Urban     | Female | Panlong District, Kunming, Yunnan Province                        | 30      | 1.62            | 58               | 22.1  | 7                  | 11968                   | 10749                     | 1887     | 66                                                  | 8         | 13          | 16         | 30           | 66         |
| FYN9      | Bai       | Urban     | Female | Panlong District, Kunming, Yunnan Province                        | 30      | 1.6             | 61               | 23.83 | 8                  | 12855                   | 12037                     | 1749     | 29                                                  | 10        | 16          | 17         | 38           | 87         |
| FYN36     | Bai       | Urban     | Male   | Panlong District, Kunming, Yunnan Province                        | 26      | 1.65            | 59               | 21.67 | 12                 | 10086                   | 8923                      | 1545     | 82                                                  | 10        | 16          | 18         | 38           | 81         |
| FYN39     | Bai       | Urban     | Male   | Panlong District, Kunming, Yunnan Province                        | 23      | 1.63            | 50               | 18.82 | 12                 | 28355                   | 25341                     | 2471     | 96                                                  | 10        | 15          | 23         | 47           | 89         |
| FYN41     | Bai       | Urban     | Male   | Panlong District, Kunming, Yunnan Province                        | 21      | 1.66            | 52               | 18.87 | 12                 | 18248                   | 15730                     | 2410     | 67                                                  | 11        | 17          | 25         | 47           | 104        |
| FYN42     | Bai       | Urban     | Male   | Panlong District, Kunming, Yunnan Province                        | 24      | 1.68            | 52               | 18.42 | 12                 | 11407                   | 10409                     | 1573     | 63                                                  | 9         | 14          | 18         | 35           | 63         |
| FYN6      | Bai       | Urban     | Male   | Panlong District, Kunming, Yunnan Province                        | 32      | 1.68            | 71               | 25.16 | 7                  | 10209                   | 8459                      | 1620     | 78                                                  | 7         | 13          | 19         | 33           | 63         |
| FYN11     | Bai       | Urban     | Female | Xishan District, Kunming, Yunnan Province                         | 22      | 1.59            | 51               | 20.17 | 8                  | 6906                    | 5935                      | 1475     | 26                                                  | 9         | 14          | 16         | 35           | 67         |
| FYN2      | Bai       | Urban     | Female | Xishan District, Kunming, Yunnan Province                         | 22      | 1.64            | 51               | 18.96 | 7                  | 6788                    | 6122                      | 1141     | 51                                                  | 6         | 12          | 13         | 28           | 58         |
| FYN12     | Bai       | Urban     | Male   | Xishan District, Kunming, Yunnan Province                         | 22      | 1.68            | 54               | 19.13 | 8                  | 10496                   | 9412                      | 2233     | 138                                                 | 5         | 12          | 14         | 30           | 63         |
| FYN13     | Bai       | Urban     | Male   | Xishan District, Kunming, Yunnan Province                         | 22      | 1.72            | 63               | 21.3  | 8                  | 24001                   | 20395                     | 2405     | 115                                                 | 11        | 17          | 23         | 51           | 105        |
| FYN19     | Bai       | Urban     | Male   | Xishan District, Kunming, Yunnan Province                         | 32      | 1.68            | 70               | 24.8  | 9                  | 28163                   | 25050                     | 2204     | 78                                                  | 9         | 15          | 22         | 41           | 84         |
| FYN20     | Bai       | Urban     | Male   | Xishan District, Kunming, Yunnan Province                         | 22      | 1.73            | 66               | 22.05 | 9                  | 8718                    | 7959                      | 1397     | 35                                                  | 7         | 12          | 11         | 26           | 61         |
| FJS2      | Han       | Rural     | Female | Binghu District, Wuxi, Jiangsu Province                           | 30      | 1.5             | 50               | 22.22 | 7                  | 15603                   | 13324                     | 2516     | 93                                                  | 11        | 16          | 19         | 38           | 77         |
| FJS3      | Han       | Rural     | Female | Binghu District, Wuxi, Jiangsu Province                           | 30      | 1.65            | 54               | 19.83 | 7                  | 30019                   | 27749                     | 3416     | 160                                                 | 8         | 14          | 19         | 38           | 83         |
| FJS5      | Han       | Rural     | Female | Binghu District, Wuxi, Jiangsu Province                           | 27      | 1.55            | 55               | 22.89 | 8                  | 17488                   | 15497                     | 2691     | 97                                                  | 9         | 16          | 24         | 47           | 96         |
| FJS6      | Han       | Rural     | Female | Binghu District, Wuxi, Jiangsu Province                           | 24      | 1.6             | 55               | 21.48 | 8                  | 15973                   | 13974                     | 3177     | 165                                                 | 8         | 14          | 20         | 42           | 92         |
| FJS9      | Han       | Rural     | Female | Binghu District, Wuxi, Jiangsu Province                           | 30      | 1.6             | 60               | 23.44 | 8                  | 9646                    | 8271                      | 2020     | 98                                                  | 6         | 14          | 18         | 43           | 83         |
| FJS1      | Han       | Rural     | Male   | Binghu District, Wuxi, Jiangsu Province                           | 33      | 1.7             | 72               | 24.91 | 7                  | 9354                    | 8854                      | 1140     | 48                                                  | 8         | 12          | 17         | 31           | 58         |
| FJS12     | Han       | Rural     | Male   | Binghu District, Wuxi, Jiangsu Province                           | 27      | 1.73            | 57               | 19.05 | 9                  | 6623                    | 5447                      | 958      | 36                                                  | 8         | 11          | 13         | 23           | 41         |



|       |     |       |        |                                               |    |      |      |       |    |       |       |      |     |    |    |    |    |     |
|-------|-----|-------|--------|-----------------------------------------------|----|------|------|-------|----|-------|-------|------|-----|----|----|----|----|-----|
| FJS4  | Han | Rural | Male   | Binghu District, Wuxi, Jiangsu Province       | 28 | 1.68 | 70   | 24.8  | 7  | 17995 | 17568 | 1154 | 48  | 7  | 11 | 15 | 31 | 59  |
| FJS7  | Han | Rural | Male   | Binghu District, Wuxi, Jiangsu Province       | 29 | 1.75 | 60   | 19.59 | 8  | 9475  | 8892  | 1432 | 58  | 8  | 10 | 13 | 29 | 57  |
| FSC10 | Han | Rural | Female | Dayi County, Chengdu, Sichuan Province        | 25 | 1.63 | 53   | 19.95 | 2  | 13028 | 10984 | 1239 | 43  | 7  | 15 | 22 | 38 | 74  |
| FSC9  | Han | Rural | Female | Dayi County, Chengdu, Sichuan Province        | 31 | 1.59 | 55   | 21.76 | 2  | 16097 | 14601 | 2491 | 110 | 11 | 18 | 24 | 46 | 89  |
| FHN13 | Han | Rural | Female | Dengfeng County, Zhengzhou, Henan Province    | 30 | 1.61 | 52.5 | 20.25 | 3  | 12592 | 11419 | 1545 | 80  | 8  | 13 | 13 | 29 | 61  |
| FHN2  | Han | Rural | Female | Dengfeng County, Zhengzhou, Henan Province    | 21 | 1.65 | 55   | 20.2  | 1  | 12509 | 11606 | 1763 | 51  | 8  | 12 | 14 | 29 | 59  |
| FHN6  | Han | Rural | Female | Dengfeng County, Zhengzhou, Henan Province    | 31 | 1.6  | 64   | 25    | 2  | 19865 | 16617 | 3016 | 182 | 8  | 13 | 15 | 30 | 66  |
| FHN7  | Han | Rural | Female | Dengfeng County, Zhengzhou, Henan Province    | 33 | 1.6  | 63   | 24.61 | 2  | 15614 | 12687 | 2996 | 263 | 9  | 17 | 23 | 48 | 103 |
| FHN9  | Han | Rural | Female | Dengfeng County, Zhengzhou, Henan Province    | 23 | 1.65 | 60   | 22.04 | 2  | 12762 | 10653 | 2976 | 242 | 10 | 14 | 14 | 33 | 74  |
| FHN1  | Han | Rural | Male   | Dengfeng County, Zhengzhou, Henan Province    | 22 | 1.7  | 73   | 25.26 | 1  | 22024 | 19836 | 2644 | 85  | 8  | 13 | 17 | 37 | 82  |
| FHN10 | Han | Rural | Male   | Dengfeng County, Zhengzhou, Henan Province    | 26 | 1.73 | 57.5 | 19.21 | 2  | 12135 | 10473 | 2766 | 193 | 10 | 15 | 21 | 44 | 84  |
| FHN11 | Han | Rural | Male   | Dengfeng County, Zhengzhou, Henan Province    | 35 | 1.73 | 70   | 23.39 | 3  | 10432 | 8467  | 2665 | 173 | 9  | 16 | 20 | 42 | 86  |
| FHN3  | Han | Rural | Male   | Dengfeng County, Zhengzhou, Henan Province    | 23 | 1.7  | 60   | 20.76 | 1  | 7000  | 6339  | 1000 | 38  | 10 | 15 | 21 | 41 | 72  |
| FHN4  | Han | Rural | Male   | Dengfeng County, Zhengzhou, Henan Province    | 22 | 1.7  | 65   | 22.49 | 1  | 8026  | 7715  | 879  | 37  | 6  | 11 | 11 | 26 | 51  |
| FHN5  | Han | Rural | Male   | Dengfeng County, Zhengzhou, Henan Province    | 33 | 1.72 | 70   | 23.66 | 1  | 20391 | 20174 | 633  | 10  | 7  | 13 | 15 | 26 | 60  |
| FHN8  | Han | Rural | Male   | Dengfeng County, Zhengzhou, Henan Province    | 28 | 1.7  | 60   | 20.76 | 2  | 10708 | 8933  | 2737 | 222 | 8  | 17 | 19 | 40 | 76  |
| FDB2  | Han | Rural | Female | Mulan County, Harbin, Heilongjiang Province   | 32 | 1.58 | 63   | 25.24 | 1  | 66538 | 55015 | 5573 | 395 | 9  | 16 | 22 | 48 | 110 |
| FDB4  | Han | Rural | Female | Mulan County, Harbin, Heilongjiang Province   | 32 | 1.6  | 48   | 18.75 | 1  | 9745  | 8335  | 1562 | 86  | 7  | 11 | 17 | 34 | 77  |
| FDB6  | Han | Rural | Female | Mulan County, Harbin, Heilongjiang Province   | 25 | 1.67 | 55   | 19.72 | 2  | 53053 | 42642 | 3238 | 176 | 9  | 18 | 24 | 48 | 106 |
| FDB1  | Han | Rural | Male   | Mulan County, Harbin, Heilongjiang Province   | 33 | 1.68 | 54   | 19.13 | 1  | 24678 | 22431 | 2857 | 112 | 9  | 15 | 17 | 35 | 72  |
| FDB3  | Han | Rural | Male   | Mulan County, Harbin, Heilongjiang Province   | 32 | 1.7  | 63   | 21.8  | 1  | 11729 | 9999  | 2426 | 120 | 9  | 13 | 15 | 34 | 73  |
| FDB5  | Han | Rural | Male   | Mulan County, Harbin, Heilongjiang Province   | 27 | 1.7  | 55   | 19.03 | 1  | 7932  | 6631  | 1308 | 43  | 8  | 13 | 20 | 37 | 76  |
| FDB7  | Han | Rural | Male   | Mulan County, Harbin, Heilongjiang Province   | 27 | 1.72 | 70   | 23.66 | 2  | 19797 | 16740 | 3012 | 191 | 9  | 14 | 18 | 40 | 86  |
| FDB9  | Han | Rural | Male   | Mulan County, Harbin, Heilongjiang Province   | 31 | 1.8  | 70   | 21.6  | 2  | 10607 | 9484  | 1629 | 50  | 8  | 13 | 18 | 38 | 73  |
| FSC18 | Han | Rural | Female | Pujiang County, Chengdu, Sichuan Province     | 32 | 1.57 | 58   | 23.53 | 2  | 9981  | 8545  | 1927 | 161 | 9  | 16 | 17 | 41 | 88  |
| FSC19 | Han | Rural | Female | Pujiang County, Chengdu, Sichuan Province     | 30 | 1.56 | 54   | 22.19 | 2  | 11082 | 10072 | 2168 | 154 | 9  | 13 | 16 | 38 | 83  |
| FSC3  | Han | Rural | Female | Pujiang County, Chengdu, Sichuan Province     | 27 | 1.58 | 60   | 24.03 | 1  | 14373 | 12621 | 2219 | 50  | 9  | 16 | 18 | 41 | 77  |
| FSC4  | Han | Rural | Female | Pujiang County, Chengdu, Sichuan Province     | 29 | 1.55 | 60   | 24.97 | 1  | 8801  | 8119  | 1471 | 44  | 8  | 11 | 12 | 27 | 61  |
| FSC5  | Han | Rural | Female | Pujiang County, Chengdu, Sichuan Province     | 32 | 1.65 | 66   | 24.24 | 1  | 9138  | 7378  | 1624 | 52  | 9  | 14 | 18 | 34 | 62  |
| FSC1  | Han | Rural | Male   | Pujiang County, Chengdu, Sichuan Province     | 31 | 1.75 | 77   | 25.14 | 1  | 19345 | 12910 | 1596 | 65  | 7  | 13 | 19 | 38 | 71  |
| FSC20 | Han | Rural | Male   | Pujiang County, Chengdu, Sichuan Province     | 30 | 1.73 | 73   | 24.39 | 3  | 13250 | 11850 | 1927 | 101 | 8  | 13 | 13 | 33 | 67  |
| FDB10 | Han | Rural | Female | Tonghe County, Harbin, Heilongjiang Province  | 27 | 1.6  | 55   | 21.48 | 2  | 15099 | 12831 | 631  | 54  | 9  | 14 | 23 | 47 | 81  |
| FDB12 | Han | Rural | Female | Tonghe County, Harbin, Heilongjiang Province  | 33 | 1.72 | 58   | 19.61 | 3  | 19105 | 15973 | 1858 | 195 | 7  | 14 | 17 | 34 | 70  |
| FDB13 | Han | Rural | Female | Tonghe County, Harbin, Heilongjiang Province  | 32 | 1.6  | 48   | 18.75 | 3  | 9525  | 8249  | 1482 | 66  | 8  | 13 | 17 | 28 | 56  |
| FDB11 | Han | Rural | Male   | Tonghe County, Harbin, Heilongjiang Province  | 32 | 1.74 | 68   | 22.46 | 3  | 96710 | 80605 | 8637 | 913 | 12 | 20 | 28 | 55 | 131 |
| FDB14 | Han | Rural | Male   | Tonghe County, Harbin, Heilongjiang Province  | 35 | 1.68 | 70   | 24.8  | 3  | 8990  | 6039  | 1149 | 51  | 8  | 11 | 19 | 37 | 81  |
| FDB15 | Han | Rural | Male   | Tonghe County, Harbin, Heilongjiang Province  | 21 | 1.7  | 67   | 23.18 | 3  | 26534 | 21685 | 3659 | 326 | 9  | 14 | 19 | 43 | 100 |
| FJS13 | Han | Urban | Female | Beitang District, Wuxi, Jiangsu Province      | 30 | 1.6  | 60   | 23.44 | 9  | 10244 | 8671  | 941  | 46  | 7  | 11 | 17 | 31 | 62  |
| FJS16 | Han | Urban | Female | Chongan District, Wuxi, Jiangsu Province      | 29 | 1.55 | 45   | 18.73 | 10 | 13046 | 10956 | 2962 | 160 | 12 | 18 | 28 | 54 | 108 |
| FJS18 | Han | Urban | Female | Chongan District, Wuxi, Jiangsu Province      | 30 | 1.6  | 55   | 21.48 | 10 | 20517 | 18257 | 3761 | 231 | 10 | 16 | 20 | 46 | 97  |
| FJS20 | Han | Urban | Female | Chongan District, Wuxi, Jiangsu Province      | 26 | 1.55 | 47   | 19.56 | 11 | 17498 | 14614 | 4039 | 257 | 11 | 16 | 24 | 49 | 114 |
| FJS21 | Han | Urban | Female | Chongan District, Wuxi, Jiangsu Province      | 24 | 1.65 | 52   | 19.1  | 11 | 13699 | 12311 | 2314 | 71  | 10 | 16 | 22 | 42 | 79  |
| FJS22 | Han | Urban | Female | Chongan District, Wuxi, Jiangsu Province      | 26 | 1.6  | 52   | 20.31 | 11 | 10756 | 9693  | 2092 | 99  | 7  | 14 | 17 | 38 | 75  |
| FJS23 | Han | Urban | Female | Chongan District, Wuxi, Jiangsu Province      | 23 | 1.88 | 66   | 18.67 | 11 | 16338 | 13743 | 1465 | 78  | 9  | 15 | 22 | 39 | 80  |
| FJS24 | Han | Urban | Female | Chongan District, Wuxi, Jiangsu Province      | 23 | 1.6  | 51   | 19.92 | 12 | 15034 | 12050 | 4014 | 327 | 11 | 16 | 21 | 46 | 111 |
| FJS14 | Han | Urban | Male   | Chongan District, Wuxi, Jiangsu Province      | 23 | 1.68 | 70   | 24.8  | 9  | 9749  | 8367  | 2167 | 123 | 8  | 14 | 15 | 35 | 72  |
| FJS15 | Han | Urban | Male   | Chongan District, Wuxi, Jiangsu Province      | 30 | 1.75 | 75   | 24.49 | 9  | 16975 | 14755 | 3167 | 126 | 7  | 13 | 16 | 36 | 72  |
| FJS17 | Han | Urban | Male   | Chongan District, Wuxi, Jiangsu Province      | 28 | 1.71 | 70   | 23.94 | 10 | 19025 | 16979 | 3339 | 175 | 8  | 14 | 17 | 40 | 94  |
| FJS19 | Han | Urban | Male   | Chongan District, Wuxi, Jiangsu Province      | 30 | 1.69 | 71   | 24.86 | 10 | 19379 | 17264 | 3457 | 197 | 7  | 15 | 21 | 43 | 99  |
| FDB29 | Han | Urban | Female | Daoli District, Harbin, Heilongjiang Province | 21 | 1.6  | 59   | 23.05 | 5  | 44292 | 36148 | 4450 | 269 | 8  | 16 | 22 | 44 | 104 |
| FDB28 | Han | Urban | Male   | Daoli District, Harbin, Heilongjiang Province | 29 | 1.79 | 80   | 24.97 | 5  | 35769 | 33360 | 2320 | 123 | 9  | 13 | 18 | 35 | 67  |
| FDB30 | Han | Urban | Male   | Daoli District, Harbin, Heilongjiang Province | 33 | 1.8  | 70   | 21.6  | 5  | 21176 | 16591 | 3115 | 200 | 10 | 14 | 22 | 41 | 81  |
| FDB31 | Han | Urban | Male   | Daoli District, Harbin, Heilongjiang Province | 29 | 1.8  | 81   | 25    | 6  | 18964 | 17922 | 1606 | 82  | 8  | 14 | 16 | 38 | 68  |

|       |        |       |        |                                                                   |    |      |    |       |    |       |       |      |     |    |    |    |    |     |
|-------|--------|-------|--------|-------------------------------------------------------------------|----|------|----|-------|----|-------|-------|------|-----|----|----|----|----|-----|
| FDB34 | Han    | Urban | Female | Daowai District, Harbin, Heilongjiang Province                    | 32 | 1.59 | 50 | 19.78 | 6  | 12711 | 11777 | 1781 | 42  | 6  | 11 | 13 | 31 | 69  |
| FDB37 | Han    | Urban | Female | Daowai District, Harbin, Heilongjiang Province                    | 28 | 1.57 | 47 | 19.07 | 6  | 15014 | 12963 | 2512 | 118 | 5  | 12 | 10 | 28 | 63  |
| FDB35 | Han    | Urban | Male   | Daowai District, Harbin, Heilongjiang Province                    | 33 | 1.75 | 70 | 22.86 | 6  | 24955 | 22140 | 3639 | 166 | 12 | 17 | 17 | 41 | 86  |
| FDB38 | Han    | Urban | Male   | Daowai District, Harbin, Heilongjiang Province                    | 28 | 1.66 | 63 | 22.86 | 6  | 13174 | 11486 | 2188 | 119 | 9  | 15 | 17 | 33 | 75  |
| FDB8  | Han    | Urban | Male   | Daowai District, Harbin, Heilongjiang Province                    | 31 | 1.72 | 65 | 21.97 | 2  | 18194 | 15746 | 3325 | 174 | 9  | 15 | 17 | 37 | 76  |
| FHN21 | Han    | Urban | Female | Jinshui District, Zhengzhou, Henan Province                       | 23 | 1.63 | 62 | 23.34 | 4  | 14247 | 11501 | 1547 | 41  | 7  | 13 | 13 | 30 | 55  |
| FHN22 | Han    | Urban | Female | Jinshui District, Zhengzhou, Henan Province                       | 24 | 1.68 | 55 | 19.49 | 4  | 27145 | 23022 | 2998 | 153 | 9  | 15 | 22 | 47 | 100 |
| FHN16 | Han    | Urban | Male   | Jinshui District, Zhengzhou, Henan Province                       | 22 | 1.84 | 70 | 20.68 | 3  | 12550 | 10133 | 1708 | 51  | 9  | 15 | 18 | 37 | 79  |
| FHN17 | Han    | Urban | Male   | Jinshui District, Zhengzhou, Henan Province                       | 22 | 1.82 | 77 | 23.25 | 3  | 11107 | 10050 | 1834 | 45  | 6  | 10 | 15 | 33 | 61  |
| FHN20 | Han    | Urban | Male   | Jinshui District, Zhengzhou, Henan Province                       | 23 | 1.77 | 72 | 22.98 | 4  | 9600  | 8656  | 1274 | 26  | 6  | 9  | 11 | 27 | 54  |
| FHN23 | Han    | Urban | Male   | Jinshui District, Zhengzhou, Henan Province                       | 23 | 1.78 | 75 | 23.67 | 5  | 15708 | 14772 | 1605 | 42  | 5  | 11 | 15 | 27 | 53  |
| FHN24 | Han    | Urban | Male   | Jinshui District, Zhengzhou, Henan Province                       | 22 | 1.8  | 67 | 20.68 | 5  | 12119 | 10642 | 1520 | 46  | 6  | 11 | 13 | 28 | 58  |
| FHN25 | Han    | Urban | Male   | Jinshui District, Zhengzhou, Henan Province                       | 24 | 1.71 | 65 | 22.23 | 5  | 8256  | 7277  | 1616 | 55  | 8  | 13 | 11 | 25 | 53  |
| FDB17 | Han    | Urban | Female | Nangang District, Harbin, Heilongjiang Province                   | 24 | 1.65 | 58 | 21.3  | 4  | 10081 | 8610  | 1863 | 107 | 4  | 13 | 13 | 31 | 66  |
| FDB25 | Han    | Urban | Female | Nangang District, Harbin, Heilongjiang Province                   | 26 | 1.6  | 56 | 21.88 | 4  | 17835 | 16770 | 2088 | 79  | 5  | 12 | 11 | 27 | 52  |
| FDB26 | Han    | Urban | Female | Nangang District, Harbin, Heilongjiang Province                   | 25 | 1.6  | 49 | 19.14 | 5  | 11381 | 9498  | 1674 | 51  | 7  | 14 | 17 | 37 | 85  |
| FDB27 | Han    | Urban | Female | Nangang District, Harbin, Heilongjiang Province                   | 32 | 1.64 | 53 | 19.71 | 5  | 8779  | 7415  | 1907 | 138 | 5  | 12 | 14 | 35 | 79  |
| FDB19 | Han    | Urban | Male   | Nangang District, Harbin, Heilongjiang Province                   | 33 | 1.78 | 75 | 23.67 | 4  | 34425 | 32399 | 2855 | 158 | 10 | 17 | 23 | 44 | 87  |
| FDB23 | Han    | Urban | Male   | Nangang District, Harbin, Heilongjiang Province                   | 25 | 1.63 | 55 | 20.7  | 4  | 22676 | 18533 | 3598 | 212 | 5  | 12 | 19 | 39 | 84  |
| FDB24 | Han    | Urban | Male   | Songbei District, Harbin, Heilongjiang Province                   | 25 | 1.84 | 67 | 19.79 | 4  | 13058 | 10889 | 1803 | 78  | 7  | 12 | 19 | 37 | 74  |
| FSC21 | Han    | Urban | Female | Wuhou District, Chengdu, Sichuan Province                         | 27 | 1.5  | 50 | 22.22 | 3  | 11135 | 8427  | 1761 | 48  | 7  | 11 | 19 | 40 | 70  |
| FSC26 | Han    | Urban | Female | Wuhou District, Chengdu, Sichuan Province                         | 28 | 1.62 | 57 | 21.72 | 3  | 11928 | 10288 | 2098 | 110 | 11 | 16 | 20 | 39 | 84  |
| FSC29 | Han    | Urban | Female | Wuhou District, Chengdu, Sichuan Province                         | 30 | 1.6  | 56 | 21.88 | 3  | 11976 | 10970 | 1501 | 32  | 10 | 19 | 25 | 45 | 89  |
| FSC30 | Han    | Urban | Female | Wuhou District, Chengdu, Sichuan Province                         | 24 | 1.65 | 53 | 19.47 | 4  | 12632 | 11692 | 1500 | 49  | 11 | 16 | 19 | 37 | 79  |
| FSC31 | Han    | Urban | Female | Wuhou District, Chengdu, Sichuan Province                         | 30 | 1.5  | 55 | 24.44 | 4  | 9580  | 9219  | 626  | 25  | 11 | 14 | 14 | 31 | 61  |
| FSC27 | Han    | Urban | Male   | Wuhou District, Chengdu, Sichuan Province                         | 32 | 1.73 | 74 | 24.73 | 3  | 18527 | 15740 | 2831 | 176 | 7  | 14 | 18 | 38 | 81  |
| FSC6  | Han    | Urban | Male   | Wuhou District, Chengdu, Sichuan Province                         | 19 | 1.66 | 55 | 19.96 | 1  | 14198 | 12471 | 1651 | 59  | 6  | 11 | 14 | 30 | 60  |
| FSC8  | Han    | Urban | Male   | Wuhou District, Chengdu, Sichuan Province                         | 19 | 1.83 | 68 | 20.31 | 2  | 11353 | 10183 | 2176 | 90  | 7  | 14 | 12 | 29 | 58  |
| FHN15 | Han    | Urban | Female | Zhongyuan District, Zhengzhou, Henan Province                     | 22 | 1.67 | 60 | 21.51 | 3  | 9965  | 9228  | 1472 | 33  | 8  | 15 | 15 | 35 | 65  |
| FHN19 | Han    | Urban | Female | Zhongyuan District, Zhengzhou, Henan Province                     | 24 | 1.58 | 55 | 22.03 | 4  | 13513 | 10726 | 1923 | 54  | 7  | 13 | 19 | 38 | 76  |
| FHN18 | Han    | Urban | Male   | Zhongyuan District, Zhengzhou, Henan Province                     | 22 | 1.7  | 65 | 22.49 | 4  | 20204 | 19404 | 885  | 19  | 7  | 12 | 13 | 29 | 53  |
| FXJ35 | Kazakh | Rural | Female | Tacheng County, Yili Prefecture, Xinjiang Uygur Autonomous Region | 26 | 1.58 | 53 | 21.23 | 11 | 8877  | 7845  | 1476 | 41  | 10 | 15 | 17 | 37 | 74  |
| FXJ36 | Kazakh | Rural | Female | Tacheng County, Yili Prefecture, Xinjiang Uygur Autonomous Region | 28 | 1.62 | 56 | 21.34 | 11 | 19373 | 17185 | 2631 | 148 | 8  | 14 | 19 | 42 | 95  |
| FXJ39 | Kazakh | Rural | Male   | Tacheng County, Yili Prefecture, Xinjiang Uygur Autonomous Region | 23 | 1.81 | 82 | 25.03 | 11 | 15634 | 15206 | 876  | 57  | 7  | 11 | 13 | 26 | 54  |
| FXJ46 | Kazakh | Rural | Male   | Tacheng County, Yili Prefecture, Xinjiang Uygur Autonomous Region | 21 | 1.81 | 79 | 24.11 | 12 | 12075 | 10669 | 1962 | 46  | 8  | 13 | 21 | 39 | 89  |
| FXJ48 | Kazakh | Rural | Male   | Tacheng County, Yili Prefecture, Xinjiang Uygur Autonomous Region | 21 | 1.85 | 73 | 21.33 | 12 | 15917 | 13989 | 2430 | 76  | 9  | 14 | 15 | 37 | 79  |
| FXJ49 | Kazakh | Rural | Male   | Tacheng County, Yili Prefecture, Xinjiang Uygur Autonomous Region | 23 | 1.6  | 63 | 24.61 | 12 | 10135 | 8755  | 1526 | 55  | 8  | 14 | 13 | 30 | 76  |
| FXJ27 | Kazakh | Rural | Female | Yining County, Yili Prefecture, Xinjiang Uygur Autonomous Region  | 22 | 1.67 | 57 | 20.44 | 10 | 21349 | 18478 | 3399 | 219 | 10 | 17 | 22 | 50 | 105 |
| FXJ28 | Kazakh | Rural | Female | Yining County, Yili Prefecture, Xinjiang Uygur Autonomous Region  | 20 | 1.6  | 52 | 20.31 | 10 | 10211 | 8887  | 1641 | 83  | 10 | 14 | 16 | 34 | 69  |
| FXJ32 | Kazakh | Rural | Female | Yining County, Yili Prefecture, Xinjiang Uygur Autonomous Region  | 21 | 1.65 | 55 | 20.2  | 10 | 7205  | 5744  | 1338 | 25  | 9  | 14 | 18 | 38 | 68  |
| FXJ51 | Kazakh | Urban | Female | Shuimogou District, Urumqi, Xinjiang Uygur Autonomous Region      | 34 | 1.65 | 53 | 19.47 | 12 | 15388 | 13329 | 2443 | 106 | 9  | 15 | 20 | 38 | 82  |
| FXJ50 | Kazakh | Urban | Male   | Shuimogou District, Urumqi, Xinjiang Uygur Autonomous Region      | 24 | 1.72 | 60 | 20.28 | 12 | 13059 | 11521 | 2014 | 86  | 6  | 14 | 17 | 38 | 86  |
| FXJ56 | Kazakh | Urban | Male   | Shuimogou District, Urumqi, Xinjiang Uygur Autonomous Region      | 26 | 1.72 | 69 | 23.32 | 12 | 13961 | 12075 | 1527 | 72  | 8  | 13 | 14 | 32 | 67  |
| FXJ26 | Kazakh | Urban | Female | Tianshan District, Urumqi, Xinjiang Uygur Autonomous Region       | 23 | 1.6  | 64 | 25    | 9  | 14585 | 13036 | 2004 | 95  | 8  | 15 | 20 | 43 | 88  |
| FXJ29 | Kazakh | Urban | Female | Tianshan District, Urumqi, Xinjiang Uygur Autonomous Region       | 24 | 1.58 | 48 | 19.23 | 10 | 9324  | 8059  | 1578 | 61  | 7  | 13 | 17 | 34 | 69  |
| FXJ30 | Kazakh | Urban | Female | Tianshan District, Urumqi, Xinjiang Uygur Autonomous Region       | 25 | 1.57 | 49 | 19.88 | 10 | 11505 | 10166 | 1806 | 90  | 8  | 13 | 17 | 40 | 74  |
| FXJ33 | Kazakh | Urban | Female | Tianshan District, Urumqi, Xinjiang Uygur Autonomous Region       | 20 | 1.62 | 60 | 22.86 | 10 | 9057  | 5274  | 1029 | 32  | 9  | 13 | 16 | 32 | 62  |
| FXJ34 | Kazakh | Urban | Female | Tianshan District, Urumqi, Xinjiang Uygur Autonomous Region       | 21 | 1.58 | 53 | 21.23 | 10 | 10439 | 9280  | 1631 | 86  | 9  | 13 | 16 | 36 | 75  |
| FXJ37 | Kazakh | Urban | Female | Tianshan District, Urumqi, Xinjiang Uygur Autonomous Region       | 23 | 1.64 | 54 | 20.08 | 11 | 12266 | 11988 | 901  | 23  | 7  | 11 | 10 | 27 | 55  |
| FXJ38 | Kazakh | Urban | Female | Tianshan District, Urumqi, Xinjiang Uygur Autonomous Region       | 18 | 1.6  | 59 | 23.05 | 11 | 14794 | 13384 | 1969 | 86  | 8  | 13 | 16 | 38 | 80  |
| FXJ40 | Kazakh | Urban | Male   | Tianshan District, Urumqi, Xinjiang Uygur Autonomous Region       | 24 | 1.72 | 68 | 22.99 | 11 | 39679 | 30401 | 5894 | 645 | 12 | 16 | 25 | 50 | 114 |
| FXJ45 | Kazakh | Urban | Male   | Tianshan District, Urumqi, Xinjiang Uygur Autonomous Region       | 20 | 1.8  | 80 | 24.69 | 11 | 14040 | 12756 | 1316 | 62  | 10 | 16 | 21 | 45 | 79  |
| FXJ47 | Kazakh | Urban | Male   | Tianshan District, Urumqi, Xinjiang Uygur Autonomous Region       | 21 | 1.82 | 65 | 19.62 | 12 | 13174 | 11763 | 2685 | 151 | 10 | 16 | 18 | 42 | 96  |

|       |         |       |        |                                                                      |    |      |      |       |    |       |       |      |     |    |    |    |    |     |
|-------|---------|-------|--------|----------------------------------------------------------------------|----|------|------|-------|----|-------|-------|------|-----|----|----|----|----|-----|
| FXM23 | Mongol  | Rural | Female | Bordered White Banner, Xilinguole, Inner Mongolia Autonomous Region  | 30 | 1.63 | 50   | 18.82 | 6  | 17719 | 13628 | 4765 | 381 | 11 | 17 | 23 | 48 | 116 |
| FXM26 | Mongol  | Rural | Female | Bordered White Banner, Xilinguole, Inner Mongolia Autonomous Region  | 29 | 1.63 | 55   | 20.7  | 6  | 21512 | 16903 | 5584 | 621 | 10 | 18 | 24 | 48 | 117 |
| FXM27 | Mongol  | Rural | Female | Bordered White Banner, Xilinguole, Inner Mongolia Autonomous Region  | 30 | 1.68 | 52   | 18.42 | 13 | 12606 | 10615 | 2733 | 224 | 8  | 13 | 14 | 39 | 83  |
| FXM28 | Mongol  | Rural | Female | Bordered White Banner, Xilinguole, Inner Mongolia Autonomous Region  | 26 | 1.63 | 54   | 20.32 | 13 | 10209 | 8294  | 2353 | 155 | 9  | 16 | 16 | 39 | 86  |
| FXM22 | Mongol  | Rural | Male   | Bordered White Banner, Xilinguole, Inner Mongolia Autonomous Region  | 33 | 1.8  | 80   | 24.69 | 6  | 13116 | 10560 | 3728 | 266 | 10 | 18 | 21 | 44 | 109 |
| FXM24 | Mongol  | Rural | Male   | Bordered White Banner, Xilinguole, Inner Mongolia Autonomous Region  | 32 | 1.8  | 75   | 23.15 | 6  | 31837 | 26544 | 5671 | 453 | 12 | 17 | 24 | 50 | 113 |
| FXM25 | Mongol  | Rural | Male   | Bordered White Banner, Xilinguole, Inner Mongolia Autonomous Region  | 30 | 1.7  | 60   | 20.76 | 6  | 22298 | 17458 | 5270 | 527 | 13 | 18 | 23 | 50 | 116 |
| FXM29 | Mongol  | Rural | Male   | Bordered White Banner, Xilinguole, Inner Mongolia Autonomous Region  | 28 | 1.74 | 76   | 25.1  | 13 | 8360  | 6348  | 3064 | 298 | 9  | 16 | 19 | 40 | 94  |
| FXM12 | Mongol  | Rural | Female | Bordered Yellow Banner, Xilinguole, Inner Mongolia Autonomous Region | 32 | 1.6  | 49   | 19.14 | 5  | 38075 | 33880 | 4605 | 367 | 10 | 19 | 24 | 48 | 112 |
| FXM13 | Mongol  | Rural | Female | Bordered Yellow Banner, Xilinguole, Inner Mongolia Autonomous Region | 30 | 1.68 | 54   | 19.13 | 5  | 42016 | 40474 | 2290 | 53  | 10 | 14 | 14 | 32 | 71  |
| FXM14 | Mongol  | Rural | Female | Bordered Yellow Banner, Xilinguole, Inner Mongolia Autonomous Region | 32 | 1.65 | 65   | 23.88 | 5  | 16858 | 13119 | 4262 | 405 | 9  | 14 | 19 | 44 | 107 |
| FXM16 | Mongol  | Rural | Female | Bordered Yellow Banner, Xilinguole, Inner Mongolia Autonomous Region | 24 | 1.6  | 64   | 25    | 5  | 15378 | 12134 | 4207 | 332 | 11 | 16 | 20 | 45 | 107 |
| FXM18 | Mongol  | Rural | Female | Bordered Yellow Banner, Xilinguole, Inner Mongolia Autonomous Region | 34 | 1.68 | 65   | 23.03 | 6  | 9285  | 7394  | 2873 | 226 | 9  | 16 | 19 | 38 | 91  |
| FXM2  | Mongol  | Rural | Female | Bordered Yellow Banner, Xilinguole, Inner Mongolia Autonomous Region | 32 | 1.6  | 50   | 19.53 | 5  | 21686 | 17385 | 3829 | 401 | 10 | 16 | 20 | 47 | 112 |
| FXM20 | Mongol  | Rural | Female | Bordered Yellow Banner, Xilinguole, Inner Mongolia Autonomous Region | 29 | 1.6  | 50   | 19.53 | 6  | 10666 | 8400  | 3327 | 244 | 9  | 17 | 21 | 46 | 109 |
| FXM21 | Mongol  | Rural | Female | Bordered Yellow Banner, Xilinguole, Inner Mongolia Autonomous Region | 24 | 1.7  | 63   | 21.8  | 6  | 13169 | 10157 | 3434 | 236 | 8  | 14 | 18 | 38 | 98  |
| FXM4  | Mongol  | Rural | Female | Bordered Yellow Banner, Xilinguole, Inner Mongolia Autonomous Region | 31 | 1.58 | 50   | 20.03 | 5  | 9575  | 7749  | 3037 | 220 | 10 | 15 | 20 | 43 | 103 |
| FXM6  | Mongol  | Rural | Female | Bordered Yellow Banner, Xilinguole, Inner Mongolia Autonomous Region | 28 | 1.6  | 65   | 25.39 | 5  | 8506  | 7384  | 1677 | 68  | 10 | 13 | 16 | 38 | 77  |
| FXM8  | Mongol  | Rural | Female | Bordered Yellow Banner, Xilinguole, Inner Mongolia Autonomous Region | 35 | 1.7  | 70   | 24.22 | 5  | 35281 | 30553 | 4047 | 286 | 10 | 16 | 22 | 46 | 95  |
| FXM1  | Mongol  | Rural | Male   | Bordered Yellow Banner, Xilinguole, Inner Mongolia Autonomous Region | 32 | 1.76 | 66   | 21.31 | 4  | 15818 | 14592 | 1700 | 121 | 8  | 13 | 14 | 35 | 79  |
| FXM11 | Mongol  | Rural | Male   | Bordered Yellow Banner, Xilinguole, Inner Mongolia Autonomous Region | 35 | 1.75 | 70   | 22.86 | 5  | 24573 | 22454 | 3173 | 188 | 9  | 16 | 19 | 40 | 93  |
| FXM15 | Mongol  | Rural | Male   | Bordered Yellow Banner, Xilinguole, Inner Mongolia Autonomous Region | 26 | 1.77 | 65   | 20.75 | 5  | 11268 | 8802  | 3367 | 202 | 12 | 18 | 21 | 43 | 96  |
| FXM17 | Mongol  | Rural | Male   | Bordered Yellow Banner, Xilinguole, Inner Mongolia Autonomous Region | 34 | 1.7  | 70   | 24.22 | 6  | 16952 | 13412 | 4833 | 499 | 11 | 16 | 22 | 41 | 104 |
| FXM19 | Mongol  | Rural | Male   | Bordered Yellow Banner, Xilinguole, Inner Mongolia Autonomous Region | 29 | 1.78 | 75   | 23.67 | 6  | 10939 | 8776  | 3148 | 212 | 9  | 14 | 18 | 42 | 98  |
| FXM3  | Mongol  | Rural | Male   | Bordered Yellow Banner, Xilinguole, Inner Mongolia Autonomous Region | 29 | 1.68 | 66   | 23.38 | 5  | 11537 | 10375 | 2286 | 111 | 8  | 13 | 13 | 37 | 81  |
| FXM5  | Mongol  | Rural | Male   | Bordered Yellow Banner, Xilinguole, Inner Mongolia Autonomous Region | 33 | 1.8  | 80   | 24.69 | 5  | 10348 | 9195  | 2016 | 93  | 9  | 14 | 18 | 37 | 75  |
| FHS10 | Mongol  | Urban | Female | Saihan District, Hohhot, Inner Mongolia Autonomous Region            | 19 | 1.58 | 60   | 24.03 | 2  | 12255 | 10874 | 1606 | 42  | 8  | 14 | 17 | 37 | 74  |
| FHS16 | Mongol  | Urban | Female | Saihan District, Hohhot, Inner Mongolia Autonomous Region            | 22 | 1.58 | 49   | 19.63 | 4  | 11545 | 10680 | 1249 | 29  | 8  | 14 | 16 | 32 | 70  |
| FHS17 | Mongol  | Urban | Female | Saihan District, Hohhot, Inner Mongolia Autonomous Region            | 21 | 1.63 | 52   | 19.57 | 4  | 8924  | 7666  | 1363 | 37  | 8  | 16 | 17 | 32 | 72  |
| FHS22 | Mongol  | Urban | Female | Saihan District, Hohhot, Inner Mongolia Autonomous Region            | 31 | 1.6  | 60   | 23.44 | 4  | 13359 | 12185 | 1539 | 35  | 9  | 15 | 17 | 36 | 76  |
| FHS3  | Mongol  | Urban | Female | Saihan District, Hohhot, Inner Mongolia Autonomous Region            | 27 | 1.65 | 52   | 19.1  | 1  | 15411 | 13559 | 2182 | 104 | 9  | 15 | 15 | 37 | 77  |
| FHS5  | Mongol  | Urban | Female | Saihan District, Hohhot, Inner Mongolia Autonomous Region            | 32 | 1.62 | 54   | 20.58 | 1  | 12247 | 10988 | 1690 | 43  | 9  | 16 | 20 | 37 | 67  |
| FHS6  | Mongol  | Urban | Female | Saihan District, Hohhot, Inner Mongolia Autonomous Region            | 34 | 1.63 | 52.5 | 19.76 | 2  | 11301 | 10294 | 1813 | 144 | 8  | 13 | 15 | 31 | 68  |
| FHS7  | Mongol  | Urban | Female | Saihan District, Hohhot, Inner Mongolia Autonomous Region            | 21 | 1.57 | 46   | 18.66 | 2  | 9911  | 8822  | 1274 | 50  | 6  | 14 | 16 | 33 | 67  |
| FHS8  | Mongol  | Urban | Female | Saihan District, Hohhot, Inner Mongolia Autonomous Region            | 21 | 1.56 | 47   | 19.31 | 2  | 23367 | 22507 | 1703 | 53  | 8  | 13 | 13 | 30 | 53  |
| FHS9  | Mongol  | Urban | Female | Saihan District, Hohhot, Inner Mongolia Autonomous Region            | 20 | 1.63 | 55   | 20.7  | 2  | 14396 | 13463 | 743  | 12  | 10 | 14 | 16 | 31 | 59  |
| FHS1  | Mongol  | Urban | Male   | Saihan District, Hohhot, Inner Mongolia Autonomous Region            | 32 | 1.67 | 69   | 24.74 | 1  | 11914 | 9617  | 1349 | 21  | 9  | 15 | 17 | 35 | 66  |
| FHS11 | Mongol  | Urban | Male   | Saihan District, Hohhot, Inner Mongolia Autonomous Region            | 32 | 1.69 | 72   | 25.21 | 3  | 9774  | 9047  | 1209 | 39  | 7  | 14 | 14 | 30 | 64  |
| FHS12 | Mongol  | Urban | Male   | Saihan District, Hohhot, Inner Mongolia Autonomous Region            | 21 | 1.72 | 63   | 21.3  | 3  | 16907 | 15499 | 1743 | 30  | 7  | 12 | 15 | 33 | 56  |
| FHS13 | Mongol  | Urban | Male   | Saihan District, Hohhot, Inner Mongolia Autonomous Region            | 21 | 1.7  | 60   | 20.76 | 3  | 9792  | 8973  | 1124 | 13  | 7  | 14 | 15 | 33 | 56  |
| FHS14 | Mongol  | Urban | Male   | Saihan District, Hohhot, Inner Mongolia Autonomous Region            | 22 | 1.68 | 60   | 21.26 | 3  | 8258  | 7831  | 754  | 19  | 9  | 15 | 15 | 33 | 55  |
| FHS15 | Mongol  | Urban | Male   | Saihan District, Hohhot, Inner Mongolia Autonomous Region            | 33 | 1.78 | 80   | 25.25 | 3  | 10962 | 9244  | 1062 | 64  | 9  | 18 | 17 | 39 | 77  |
| FHS18 | Mongol  | Urban | Male   | Saihan District, Hohhot, Inner Mongolia Autonomous Region            | 34 | 1.68 | 65   | 23.03 | 4  | 18687 | 16995 | 2049 | 41  | 8  | 15 | 15 | 33 | 60  |
| FHS19 | Mongol  | Urban | Male   | Saihan District, Hohhot, Inner Mongolia Autonomous Region            | 20 | 1.69 | 57   | 19.96 | 4  | 27315 | 25835 | 1632 | 27  | 10 | 17 | 22 | 41 | 81  |
| FHS2  | Mongol  | Urban | Male   | Saihan District, Hohhot, Inner Mongolia Autonomous Region            | 30 | 1.75 | 77   | 25.14 | 1  | 9931  | 9161  | 1224 | 12  | 8  | 14 | 17 | 32 | 64  |
| FHS20 | Mongol  | Urban | Male   | Saihan District, Hohhot, Inner Mongolia Autonomous Region            | 32 | 1.7  | 72   | 24.91 | 4  | 11986 | 10724 | 1745 | 58  | 10 | 15 | 19 | 34 | 69  |
| FHS21 | Mongol  | Urban | Male   | Saihan District, Hohhot, Inner Mongolia Autonomous Region            | 30 | 1.7  | 70   | 24.22 | 4  | 8715  | 8047  | 1190 | 35  | 6  | 11 | 12 | 29 | 54  |
| FHS4  | Mongol  | Urban | Male   | Saihan District, Hohhot, Inner Mongolia Autonomous Region            | 35 | 1.7  | 72.5 | 25.09 | 1  | 19198 | 17202 | 2167 | 93  | 6  | 12 | 13 | 29 | 70  |
| FXZ11 | Tibetan | Rural | Female | Nagqu County, Nagqu, Tibetan Autonomous Region                       | 23 | 1.55 | 50   | 20.81 | 2  | 14108 | 13340 | 1309 | 131 | 6  | 12 | 15 | 35 | 68  |
| FXZ12 | Tibetan | Rural | Female | Nagqu County, Nagqu, Tibetan Autonomous Region                       | 20 | 1.55 | 50   | 20.81 | 2  | 15433 | 14644 | 1725 | 219 | 8  | 14 | 16 | 31 | 74  |
| FXZ13 | Tibetan | Rural | Female | Nagqu County, Nagqu, Tibetan Autonomous Region                       | 20 | 1.58 | 52   | 20.83 | 2  | 19753 | 17550 | 3179 | 315 | 7  | 17 | 20 | 45 | 90  |
| FXZ14 | Tibetan | Rural | Female | Nagqu County, Nagqu, Tibetan Autonomous Region                       | 27 | 1.55 | 50   | 20.81 | 2  | 13892 | 12172 | 689  | 109 | 7  | 12 | 17 | 31 | 47  |
| FXZ15 | Tibetan | Rural | Female | Nagqu County, Nagqu, Tibetan Autonomous Region                       | 27 | 1.55 | 50   | 20.81 | 2  | 9451  | 8359  | 1970 | 151 | 8  | 13 | 16 | 41 | 76  |

|       |         |       |        |                                                              |    |      |    |       |    |       |       |      |     |    |    |    |    |     |
|-------|---------|-------|--------|--------------------------------------------------------------|----|------|----|-------|----|-------|-------|------|-----|----|----|----|----|-----|
| FXZ16 | Tibetan | Rural | Female | Nagqu County, Nagqu, Tibetan Autonomous Region               | 24 | 1.55 | 50 | 20.81 | 3  | 9042  | 8017  | 2110 | 185 | 8  | 15 | 16 | 33 | 66  |
| FXZ17 | Tibetan | Rural | Female | Nagqu County, Nagqu, Tibetan Autonomous Region               | 20 | 1.53 | 50 | 21.36 | 3  | 14297 | 13165 | 788  | 55  | 4  | 7  | 6  | 18 | 30  |
| FXZ18 | Tibetan | Rural | Female | Nagqu County, Nagqu, Tibetan Autonomous Region               | 19 | 1.58 | 53 | 21.23 | 3  | 21876 | 19477 | 2530 | 242 | 8  | 13 | 16 | 40 | 85  |
| FXZ19 | Tibetan | Rural | Female | Nagqu County, Nagqu, Tibetan Autonomous Region               | 25 | 1.5  | 50 | 22.22 | 3  | 10462 | 9461  | 625  | 70  | 5  | 11 | 9  | 19 | 32  |
| FXZ33 | Tibetan | Rural | Female | Nagqu County, Nagqu, Tibetan Autonomous Region               | 25 | 1.6  | 58 | 22.66 | 5  | 21077 | 19577 | 2764 | 196 | 6  | 14 | 18 | 37 | 79  |
| FXZ34 | Tibetan | Rural | Female | Nagqu County, Nagqu, Tibetan Autonomous Region               | 25 | 1.61 | 55 | 21.22 | 6  | 15529 | 14528 | 1660 | 149 | 8  | 14 | 20 | 36 | 79  |
| FXZ5  | Tibetan | Rural | Female | Nagqu County, Nagqu, Tibetan Autonomous Region               | 28 | 1.58 | 58 | 23.23 | 1  | 20812 | 18885 | 1903 | 132 | 6  | 12 | 15 | 33 | 71  |
| FXZ9  | Tibetan | Rural | Female | Nagqu County, Nagqu, Tibetan Autonomous Region               | 22 | 1.6  | 55 | 21.48 | 1  | 10220 | 8544  | 1659 | 102 | 7  | 15 | 15 | 35 | 75  |
| FXZ1  | Tibetan | Rural | Male   | Nagqu County, Nagqu, Tibetan Autonomous Region               | 28 | 1.58 | 62 | 24.84 | 1  | 16573 | 14755 | 1840 | 78  | 6  | 12 | 15 | 38 | 73  |
| FXZ10 | Tibetan | Rural | Male   | Nagqu County, Nagqu, Tibetan Autonomous Region               | 23 | 1.72 | 70 | 23.66 | 1  | 11383 | 11030 | 799  | 15  | 4  | 9  | 10 | 21 | 37  |
| FXZ21 | Tibetan | Rural | Male   | Nagqu County, Nagqu, Tibetan Autonomous Region               | 23 | 1.65 | 65 | 23.88 | 3  | 16430 | 15286 | 2377 | 284 | 9  | 11 | 19 | 41 | 76  |
| FXZ22 | Tibetan | Rural | Male   | Nagqu County, Nagqu, Tibetan Autonomous Region               | 23 | 1.63 | 65 | 24.46 | 4  | 11938 | 11156 | 1580 | 61  | 5  | 12 | 11 | 29 | 64  |
| FXZ23 | Tibetan | Rural | Male   | Nagqu County, Nagqu, Tibetan Autonomous Region               | 23 | 1.8  | 70 | 21.6  | 4  | 14877 | 13737 | 1979 | 175 | 6  | 10 | 15 | 33 | 67  |
| FXZ24 | Tibetan | Rural | Male   | Nagqu County, Nagqu, Tibetan Autonomous Region               | 24 | 1.78 | 70 | 22.09 | 4  | 32002 | 29028 | 2888 | 214 | 7  | 15 | 14 | 36 | 70  |
| FXZ25 | Tibetan | Rural | Male   | Nagqu County, Nagqu, Tibetan Autonomous Region               | 24 | 1.78 | 73 | 23.04 | 4  | 25014 | 23773 | 2055 | 79  | 7  | 12 | 14 | 33 | 77  |
| FXZ26 | Tibetan | Rural | Male   | Nagqu County, Nagqu, Tibetan Autonomous Region               | 29 | 1.72 | 70 | 23.66 | 4  | 13976 | 12481 | 1800 | 142 | 7  | 15 | 14 | 30 | 70  |
| FXZ27 | Tibetan | Rural | Male   | Nagqu County, Nagqu, Tibetan Autonomous Region               | 26 | 1.65 | 70 | 25.71 | 5  | 11316 | 10373 | 2023 | 203 | 7  | 15 | 16 | 33 | 73  |
| FXZ3  | Tibetan | Rural | Male   | Nagqu County, Nagqu, Tibetan Autonomous Region               | 24 | 1.72 | 65 | 21.97 | 1  | 7688  | 7105  | 1036 | 48  | 6  | 9  | 11 | 24 | 49  |
| FXZ30 | Tibetan | Rural | Male   | Nagqu County, Nagqu, Tibetan Autonomous Region               | 22 | 1.73 | 65 | 21.72 | 5  | 15942 | 14816 | 1361 | 93  | 5  | 10 | 12 | 27 | 62  |
| FXZ31 | Tibetan | Rural | Male   | Nagqu County, Nagqu, Tibetan Autonomous Region               | 23 | 1.72 | 65 | 21.97 | 5  | 13845 | 12066 | 2393 | 89  | 7  | 11 | 12 | 32 | 72  |
| FXZ32 | Tibetan | Rural | Male   | Nagqu County, Nagqu, Tibetan Autonomous Region               | 23 | 1.75 | 71 | 23.18 | 5  | 14332 | 13682 | 1153 | 35  | 6  | 12 | 12 | 26 | 45  |
| FXZ35 | Tibetan | Rural | Male   | Nagqu County, Nagqu, Tibetan Autonomous Region               | 28 | 1.65 | 65 | 23.88 | 6  | 10204 | 9546  | 920  | 32  | 6  | 13 | 12 | 27 | 49  |
| FXZ36 | Tibetan | Rural | Male   | Nagqu County, Nagqu, Tibetan Autonomous Region               | 20 | 1.68 | 58 | 20.55 | 6  | 11308 | 10550 | 959  | 55  | 4  | 10 | 9  | 24 | 44  |
| FXZ37 | Tibetan | Urban | Female | Chengguan District, Lhasa, Tibetan Autonomous Region         | 35 | 1.62 | 58 | 22.1  | 6  | 75083 | 64200 | 6376 | 507 | 7  | 14 | 20 | 49 | 112 |
| FXZ44 | Tibetan | Urban | Female | Chengguan District, Lhasa, Tibetan Autonomous Region         | 30 | 1.65 | 56 | 20.57 | 6  | 17338 | 15930 | 2534 | 320 | 10 | 16 | 18 | 43 | 92  |
| FXZ45 | Tibetan | Urban | Female | Chengguan District, Lhasa, Tibetan Autonomous Region         | 29 | 1.66 | 62 | 22.5  | 6  | 12771 | 11980 | 1015 | 27  | 6  | 11 | 9  | 25 | 48  |
| FXZ47 | Tibetan | Urban | Female | Chengguan District, Lhasa, Tibetan Autonomous Region         | 26 | 1.6  | 49 | 19.14 | 6  | 13798 | 11878 | 2354 | 284 | 10 | 14 | 16 | 34 | 75  |
| FXZ48 | Tibetan | Urban | Female | Chengguan District, Lhasa, Tibetan Autonomous Region         | 22 | 1.6  | 56 | 21.88 | 13 | 19779 | 17658 | 2557 | 174 | 7  | 13 | 15 | 37 | 78  |
| FXZ49 | Tibetan | Urban | Female | Chengguan District, Lhasa, Tibetan Autonomous Region         | 22 | 1.61 | 55 | 21.22 | 13 | 16623 | 14422 | 2324 | 122 | 7  | 12 | 14 | 34 | 65  |
| FXZ50 | Tibetan | Urban | Female | Chengguan District, Lhasa, Tibetan Autonomous Region         | 24 | 1.61 | 50 | 19.29 | 13 | 12673 | 11394 | 1710 | 58  | 8  | 12 | 12 | 26 | 51  |
| FXZ52 | Tibetan | Urban | Female | Chengguan District, Lhasa, Tibetan Autonomous Region         | 23 | 1.65 | 53 | 19.47 | 13 | 13916 | 12903 | 1257 | 56  | 6  | 13 | 16 | 29 | 61  |
| FXZ40 | Tibetan | Urban | Male   | Chengguan District, Lhasa, Tibetan Autonomous Region         | 21 | 1.7  | 65 | 22.49 | 6  | 12167 | 11000 | 1966 | 71  | 7  | 14 | 16 | 32 | 74  |
| FXZ41 | Tibetan | Urban | Male   | Chengguan District, Lhasa, Tibetan Autonomous Region         | 22 | 1.72 | 65 | 21.97 | 6  | 11518 | 10348 | 2008 | 77  | 6  | 13 | 15 | 35 | 66  |
| FXZ46 | Tibetan | Urban | Male   | Chengguan District, Lhasa, Tibetan Autonomous Region         | 24 | 1.75 | 72 | 23.51 | 6  | 13363 | 12533 | 1883 | 149 | 8  | 10 | 12 | 25 | 54  |
| FXZ51 | Tibetan | Urban | Male   | Chengguan District, Lhasa, Tibetan Autonomous Region         | 25 | 1.72 | 60 | 20.28 | 13 | 17134 | 15490 | 2078 | 92  | 7  | 13 | 14 | 35 | 73  |
| FXZ53 | Tibetan | Urban | Male   | Chengguan District, Lhasa, Tibetan Autonomous Region         | 26 | 1.6  | 50 | 19.53 | 13 | 14439 | 13496 | 913  | 183 | 6  | 13 | 20 | 40 | 76  |
| FXZ54 | Tibetan | Urban | Male   | Chengguan District, Lhasa, Tibetan Autonomous Region         | 21 | 1.59 | 48 | 18.99 | 13 | 24633 | 22518 | 2575 | 113 | 9  | 14 | 18 | 37 | 76  |
| FXZ56 | Tibetan | Urban | Male   | Chengguan District, Lhasa, Tibetan Autonomous Region         | 35 | 1.65 | 55 | 20.2  | 13 | 14653 | 13622 | 1688 | 149 | 7  | 12 | 11 | 29 | 54  |
| FXJ13 | Uyghur  | Rural | Female | Altay County, Altay, Xinjiang Uygur Autonomous Region        | 22 | 1.62 | 54 | 20.58 | 8  | 14838 | 13132 | 2629 | 80  | 11 | 17 | 20 | 46 | 97  |
| FXJ14 | Uyghur  | Rural | Female | Altay County, Altay, Xinjiang Uygur Autonomous Region        | 20 | 1.68 | 58 | 20.55 | 8  | 12208 | 11100 | 1716 | 93  | 10 | 15 | 18 | 39 | 84  |
| FXJ19 | Uyghur  | Rural | Female | Altay County, Altay, Xinjiang Uygur Autonomous Region        | 22 | 1.6  | 48 | 18.75 | 9  | 8500  | 7547  | 1551 | 93  | 9  | 16 | 17 | 34 | 75  |
| FXJ20 | Uyghur  | Rural | Female | Altay County, Altay, Xinjiang Uygur Autonomous Region        | 22 | 1.67 | 58 | 20.8  | 9  | 14974 | 13277 | 2570 | 152 | 10 | 16 | 22 | 44 | 97  |
| FXJ21 | Uyghur  | Rural | Female | Altay County, Altay, Xinjiang Uygur Autonomous Region        | 22 | 1.65 | 67 | 24.61 | 9  | 9959  | 8933  | 1919 | 190 | 7  | 13 | 16 | 33 | 78  |
| FXJ10 | Uyghur  | Rural | Male   | Altay County, Altay, Xinjiang Uygur Autonomous Region        | 22 | 1.8  | 70 | 21.6  | 8  | 11042 | 9432  | 2071 | 60  | 9  | 15 | 17 | 40 | 94  |
| FXJ3  | Uyghur  | Rural | Male   | Altay County, Altay, Xinjiang Uygur Autonomous Region        | 23 | 1.7  | 68 | 23.53 | 7  | 17312 | 15479 | 2500 | 140 | 8  | 15 | 17 | 43 | 93  |
| FXJ4  | Uyghur  | Rural | Male   | Altay County, Altay, Xinjiang Uygur Autonomous Region        | 21 | 1.75 | 58 | 18.94 | 7  | 8677  | 7743  | 1496 | 60  | 7  | 13 | 14 | 35 | 70  |
| FXJ7  | Uyghur  | Rural | Male   | Altay County, Altay, Xinjiang Uygur Autonomous Region        | 23 | 1.75 | 60 | 19.59 | 7  | 12964 | 9806  | 1613 | 58  | 10 | 16 | 19 | 36 | 83  |
| FXJ5  | Uyghur  | Urban | Male   | Shuimogou District, Urumqi, Xinjiang Uygur Autonomous Region | 23 | 1.75 | 68 | 22.2  | 7  | 18080 | 15195 | 2660 | 116 | 10 | 16 | 19 | 41 | 90  |
| FXJ52 | Uyghur  | Urban | Male   | Shuimogou District, Urumqi, Xinjiang Uygur Autonomous Region | 26 | 1.76 | 65 | 20.98 | 12 | 15092 | 12586 | 3151 | 137 | 9  | 14 | 19 | 41 | 99  |
| FXJ16 | Uyghur  | Urban | Female | Tianshan District, Urumqi, Xinjiang Uygur Autonomous Region  | 20 | 1.62 | 52 | 19.81 | 8  | 15997 | 14113 | 2066 | 165 | 9  | 13 | 16 | 37 | 89  |
| FXJ17 | Uyghur  | Urban | Female | Tianshan District, Urumqi, Xinjiang Uygur Autonomous Region  | 22 | 1.6  | 57 | 22.27 | 8  | 23013 | 20186 | 3878 | 205 | 12 | 17 | 22 | 46 | 112 |
| FXJ18 | Uyghur  | Urban | Female | Tianshan District, Urumqi, Xinjiang Uygur Autonomous Region  | 21 | 1.63 | 54 | 20.32 | 9  | 22075 | 18930 | 3997 | 238 | 12 | 16 | 21 | 48 | 112 |
| FXJ23 | Uyghur  | Urban | Female | Tianshan District, Urumqi, Xinjiang Uygur Autonomous Region  | 22 | 1.55 | 53 | 22.06 | 9  | 12750 | 9337  | 2535 | 229 | 10 | 16 | 20 | 45 | 104 |

|       |        |       |        |                                                                 |    |      |      |       |    |       |       |      |     |    |    |    |    |     |
|-------|--------|-------|--------|-----------------------------------------------------------------|----|------|------|-------|----|-------|-------|------|-----|----|----|----|----|-----|
| FXJ24 | Uyghur | Urban | Female | Tianshan District, Urumqi, Xinjiang Uygur Autonomous Region     | 20 | 1.58 | 52   | 20.83 | 9  | 18105 | 15926 | 2587 | 104 | 10 | 15 | 19 | 43 | 88  |
| FXJ11 | Uyghur | Urban | Male   | Tianshan District, Urumqi, Xinjiang Uygur Autonomous Region     | 24 | 1.71 | 72   | 24.62 | 8  | 12228 | 8886  | 1301 | 36  | 9  | 13 | 18 | 35 | 73  |
| FXJ2  | Uyghur | Urban | Male   | Tianshan District, Urumqi, Xinjiang Uygur Autonomous Region     | 23 | 1.8  | 67   | 20.68 | 7  | 5992  | 4928  | 1278 | 53  | 7  | 12 | 16 | 32 | 59  |
| FXJ6  | Uyghur | Urban | Male   | Tianshan District, Urumqi, Xinjiang Uygur Autonomous Region     | 22 | 1.72 | 63   | 21.3  | 7  | 21801 | 18440 | 2551 | 99  | 12 | 17 | 18 | 37 | 85  |
| FXJ8  | Uyghur | Urban | Male   | Tianshan District, Urumqi, Xinjiang Uygur Autonomous Region     | 25 | 1.71 | 60   | 20.52 | 7  | 33773 | 29451 | 4873 | 281 | 11 | 19 | 24 | 54 | 128 |
| FXJ9  | Uyghur | Urban | Male   | Tianshan District, Urumqi, Xinjiang Uygur Autonomous Region     | 26 | 1.69 | 59   | 20.66 | 8  | 20817 | 17617 | 3280 | 129 | 11 | 16 | 24 | 47 | 111 |
| FGX19 | Zhuang | Rural | Female | Lingyun County, Baise, Guangxi Zhuang Autonomous Region         | 30 | 1.6  | 60   | 23.44 | 9  | 17005 | 14651 | 2817 | 159 | 9  | 14 | 15 | 36 | 80  |
| FGX22 | Zhuang | Rural | Female | Lingyun County, Baise, Guangxi Zhuang Autonomous Region         | 28 | 1.58 | 50   | 20.03 | 10 | 16428 | 14351 | 2297 | 74  | 8  | 14 | 13 | 31 | 65  |
| FGX23 | Zhuang | Rural | Female | Lingyun County, Baise, Guangxi Zhuang Autonomous Region         | 25 | 1.6  | 54   | 21.09 | 10 | 44324 | 34879 | 3324 | 238 | 6  | 13 | 19 | 41 | 88  |
| FGX24 | Zhuang | Rural | Female | Lingyun County, Baise, Guangxi Zhuang Autonomous Region         | 30 | 1.55 | 45   | 18.73 | 10 | 19004 | 15645 | 1678 | 101 | 7  | 12 | 17 | 38 | 73  |
| FGX25 | Zhuang | Rural | Female | Lingyun County, Baise, Guangxi Zhuang Autonomous Region         | 30 | 1.58 | 47   | 18.83 | 10 | 12108 | 10105 | 733  | 96  | 6  | 10 | 9  | 21 | 41  |
| FGX31 | Zhuang | Rural | Female | Lingyun County, Baise, Guangxi Zhuang Autonomous Region         | 28 | 1.56 | 47   | 19.31 | 11 | 18471 | 16449 | 2698 | 150 | 9  | 15 | 16 | 43 | 88  |
| FGX33 | Zhuang | Rural | Female | Lingyun County, Baise, Guangxi Zhuang Autonomous Region         | 27 | 1.6  | 49   | 19.14 | 11 | 21504 | 18469 | 3300 | 188 | 11 | 14 | 23 | 50 | 105 |
| FGX38 | Zhuang | Rural | Female | Lingyun County, Baise, Guangxi Zhuang Autonomous Region         | 31 | 1.56 | 51   | 20.96 | 12 | 16965 | 14177 | 2555 | 167 | 9  | 15 | 18 | 35 | 88  |
| FGX41 | Zhuang | Rural | Female | Lingyun County, Baise, Guangxi Zhuang Autonomous Region         | 30 | 1.55 | 45   | 18.73 | 12 | 13034 | 11547 | 2196 | 90  | 8  | 10 | 16 | 32 | 69  |
| FGX42 | Zhuang | Rural | Female | Lingyun County, Baise, Guangxi Zhuang Autonomous Region         | 27 | 1.56 | 47   | 19.31 | 12 | 13193 | 11619 | 1975 | 61  | 9  | 14 | 15 | 35 | 65  |
| FGX26 | Zhuang | Rural | Male   | Lingyun County, Baise, Guangxi Zhuang Autonomous Region         | 30 | 1.6  | 53   | 20.7  | 10 | 80667 | 70468 | 6067 | 559 | 10 | 16 | 20 | 50 | 110 |
| FGX27 | Zhuang | Rural | Male   | Lingyun County, Baise, Guangxi Zhuang Autonomous Region         | 30 | 1.6  | 55   | 21.48 | 10 | 17179 | 14777 | 1914 | 117 | 7  | 13 | 15 | 37 | 85  |
| FGX28 | Zhuang | Rural | Male   | Lingyun County, Baise, Guangxi Zhuang Autonomous Region         | 32 | 1.58 | 47   | 18.83 | 10 | 11902 | 10590 | 1678 | 123 | 7  | 14 | 14 | 33 | 75  |
| FGX29 | Zhuang | Rural | Male   | Lingyun County, Baise, Guangxi Zhuang Autonomous Region         | 30 | 1.6  | 55   | 21.48 | 11 | 24532 | 22292 | 1674 | 58  | 9  | 12 | 16 | 28 | 64  |
| FGX30 | Zhuang | Rural | Male   | Lingyun County, Baise, Guangxi Zhuang Autonomous Region         | 25 | 1.6  | 53   | 20.7  | 11 | 12428 | 10889 | 1798 | 72  | 6  | 13 | 13 | 33 | 77  |
| FGX32 | Zhuang | Rural | Male   | Lingyun County, Baise, Guangxi Zhuang Autonomous Region         | 28 | 1.7  | 60   | 20.76 | 11 | 15013 | 13959 | 1536 | 94  | 7  | 13 | 12 | 30 | 72  |
| FGX34 | Zhuang | Rural | Male   | Lingyun County, Baise, Guangxi Zhuang Autonomous Region         | 34 | 1.7  | 65   | 22.49 | 11 | 12162 | 10963 | 1248 | 33  | 6  | 12 | 15 | 30 | 61  |
| FGX35 | Zhuang | Rural | Male   | Lingyun County, Baise, Guangxi Zhuang Autonomous Region         | 27 | 1.68 | 55   | 19.49 | 11 | 11308 | 9404  | 2384 | 138 | 10 | 14 | 20 | 40 | 87  |
| FGX37 | Zhuang | Rural | Male   | Lingyun County, Baise, Guangxi Zhuang Autonomous Region         | 30 | 1.68 | 70   | 24.8  | 12 | 6204  | 4561  | 1063 | 44  | 10 | 14 | 16 | 29 | 61  |
| FGX40 | Zhuang | Rural | Male   | Lingyun County, Baise, Guangxi Zhuang Autonomous Region         | 35 | 1.65 | 65   | 23.88 | 12 | 10185 | 9078  | 1247 | 47  | 6  | 11 | 11 | 26 | 52  |
| FGX43 | Zhuang | Rural | Male   | Lingyun County, Baise, Guangxi Zhuang Autonomous Region         | 25 | 1.68 | 60   | 21.26 | 12 | 13725 | 12493 | 2064 | 85  | 8  | 14 | 14 | 35 | 65  |
| FGX44 | Zhuang | Rural | Male   | Lingyun County, Baise, Guangxi Zhuang Autonomous Region         | 33 | 1.68 | 70   | 24.8  | 13 | 18344 | 16539 | 2457 | 119 | 10 | 17 | 17 | 38 | 74  |
| FGX45 | Zhuang | Rural | Male   | Lingyun County, Baise, Guangxi Zhuang Autonomous Region         | 28 | 1.65 | 55   | 20.2  | 13 | 13329 | 11801 | 1598 | 98  | 9  | 15 | 19 | 39 | 75  |
| FGX46 | Zhuang | Rural | Male   | Lingyun County, Baise, Guangxi Zhuang Autonomous Region         | 28 | 1.6  | 55   | 21.48 | 13 | 17795 | 15754 | 830  | 47  | 8  | 14 | 19 | 32 | 63  |
| FGX13 | Zhuang | Urban | Female | Xingning District, Nanning, Guangxi Zhuang Autonomous Region    | 25 | 1.6  | 47.5 | 18.55 | 8  | 34645 | 26170 | 2437 | 421 | 10 | 15 | 19 | 45 | 98  |
| FGX3  | Zhuang | Urban | Female | Xingning District, Nanning, Guangxi Zhuang Autonomous Region    | 30 | 1.56 | 48   | 19.72 | 7  | 12480 | 11465 | 2164 | 80  | 10 | 16 | 16 | 33 | 72  |
| FGX36 | Zhuang | Urban | Female | Xingning District, Nanning, Guangxi Zhuang Autonomous Region    | 30 | 1.5  | 42   | 18.67 | 12 | 8565  | 7327  | 1149 | 64  | 8  | 13 | 16 | 31 | 49  |
| FGX39 | Zhuang | Urban | Female | Xingning District, Nanning, Guangxi Zhuang Autonomous Region    | 25 | 1.6  | 50   | 19.53 | 12 | 9399  | 8159  | 1440 | 61  | 8  | 13 | 16 | 34 | 63  |
| FGX9  | Zhuang | Urban | Female | Xingning District, Nanning, Guangxi Zhuang Autonomous Region    | 27 | 1.62 | 52   | 19.81 | 8  | 10685 | 9699  | 1895 | 74  | 10 | 16 | 15 | 33 | 70  |
| FGX10 | Zhuang | Urban | Male   | Xingning District, Nanning, Guangxi Zhuang Autonomous Region    | 26 | 1.78 | 68   | 21.46 | 8  | 18895 | 16746 | 2796 | 268 | 10 | 16 | 17 | 37 | 81  |
| FGX11 | Zhuang | Urban | Male   | Xingning District, Nanning, Guangxi Zhuang Autonomous Region    | 31 | 1.71 | 59   | 20.18 | 8  | 11632 | 11126 | 1200 | 39  | 6  | 12 | 13 | 27 | 50  |
| FGX12 | Zhuang | Urban | Male   | Xingning District, Nanning, Guangxi Zhuang Autonomous Region    | 32 | 1.69 | 59   | 20.66 | 8  | 10402 | 8815  | 1807 | 112 | 8  | 14 | 13 | 32 | 68  |
| FGX2  | Zhuang | Urban | Male   | Xingning District, Nanning, Guangxi Zhuang Autonomous Region    | 28 | 1.72 | 56   | 18.93 | 7  | 13067 | 12205 | 924  | 47  | 11 | 15 | 13 | 30 | 61  |
| FGX4  | Zhuang | Urban | Male   | Xingning District, Nanning, Guangxi Zhuang Autonomous Region    | 29 | 1.66 | 62   | 22.5  | 7  | 20296 | 17264 | 1488 | 92  | 9  | 13 | 17 | 35 | 69  |
| FGX5  | Zhuang | Urban | Male   | Xingning District, Nanning, Guangxi Zhuang Autonomous Region    | 32 | 1.64 | 59   | 21.94 | 7  | 23043 | 20147 | 3050 | 188 | 7  | 13 | 16 | 32 | 68  |
| FGX1  | Zhuang | Urban | Female | Xixiangtang District, Nanning, Guangxi Zhuang Autonomous Region | 25 | 1.59 | 48   | 18.99 | 7  | 11896 | 10656 | 2023 | 130 | 7  | 11 | 17 | 36 | 74  |
| FGX15 | Zhuang | Urban | Female | Xixiangtang District, Nanning, Guangxi Zhuang Autonomous Region | 25 | 1.6  | 52   | 20.31 | 9  | 9625  | 8531  | 1308 | 35  | 9  | 15 | 17 | 31 | 63  |
| FGX17 | Zhuang | Urban | Female | Xixiangtang District, Nanning, Guangxi Zhuang Autonomous Region | 25 | 1.56 | 46   | 18.9  | 9  | 13199 | 11685 | 2189 | 179 | 7  | 14 | 14 | 36 | 82  |
| FGX20 | Zhuang | Urban | Female | Xixiangtang District, Nanning, Guangxi Zhuang Autonomous Region | 26 | 1.55 | 45   | 18.73 | 9  | 9258  | 7247  | 1158 | 36  | 9  | 14 | 13 | 34 | 61  |
| FGX6  | Zhuang | Urban | Female | Xixiangtang District, Nanning, Guangxi Zhuang Autonomous Region | 24 | 1.6  | 50   | 19.53 | 7  | 13208 | 10914 | 1009 | 89  | 6  | 12 | 11 | 24 | 53  |
| FGX7  | Zhuang | Urban | Female | Xixiangtang District, Nanning, Guangxi Zhuang Autonomous Region | 28 | 1.6  | 51   | 19.92 | 7  | 7423  | 6243  | 1592 | 82  | 8  | 14 | 16 | 36 | 70  |
| FGX8  | Zhuang | Urban | Female | Xixiangtang District, Nanning, Guangxi Zhuang Autonomous Region | 25 | 1.58 | 47   | 18.83 | 8  | 13287 | 11780 | 1392 | 77  | 7  | 13 | 14 | 32 | 61  |
| FGX14 | Zhuang | Urban | Male   | Xixiangtang District, Nanning, Guangxi Zhuang Autonomous Region | 27 | 1.65 | 67   | 24.61 | 8  | 15312 | 13809 | 2022 | 94  | 8  | 14 | 15 | 36 | 86  |
| FGX16 | Zhuang | Urban | Male   | Xixiangtang District, Nanning, Guangxi Zhuang Autonomous Region | 30 | 1.73 | 65   | 21.72 | 9  | 14719 | 14120 | 956  | 28  | 10 | 14 | 16 | 33 | 71  |
| FGX18 | Zhuang | Urban | Male   | Xixiangtang District, Nanning, Guangxi Zhuang Autonomous Region | 28 | 1.6  | 62   | 24.22 | 9  | 12073 | 10425 | 1649 | 43  | 10 | 15 | 19 | 38 | 83  |
| FGX21 | Zhuang | Urban | Male   | Xixiangtang District, Nanning, Guangxi Zhuang Autonomous Region | 32 | 1.63 | 61   | 22.96 | 9  | 9765  | 7179  | 1184 | 23  | 7  | 13 | 15 | 29 | 59  |

171 **Supplementary Table S3** Abundant genera identified in this study.

| Genus                        | Proportion in total used sequences (%) | Prevalence (n/%) | Median (%) | Range (%)   |
|------------------------------|----------------------------------------|------------------|------------|-------------|
| <i>Phascolarctobacterium</i> | 13.16                                  | 314/100.0%       | 9.30       | 0.007-70.39 |
| <i>Roseburia</i>             | 6.70                                   | 314/100.0%       | 5.29       | 0.017-34.56 |
| <i>Prevotella</i>            | 6.00                                   | 305/97.1%        | 0.98       | 0-55.91     |
| <i>Bacteroides</i>           | 5.54                                   | 314/100.0%       | 3.09       | 0.017-55.08 |
| <i>Blautia</i>               | 4.78                                   | 314/100.0%       | 3.89       | 0.124-25.81 |
| <i>Megamonas</i>             | 4.74                                   | 290/92.4%        | 0.18       | 0-57.01     |
| <i>Faecalibacterium</i>      | 4.63                                   | 314/100.0%       | 3.31       | 0.010-22.36 |
| <i>Clostridium</i>           | 4.58                                   | 314/100.0%       | 4.02       | 0.159-17.68 |
| <i>Subdoligranulum</i>       | 3.42                                   | 314/100.0%       | 2.80       | 0.023-21.47 |
| <i>Ruminococcus</i>          | 2.78                                   | 314/100.0%       | 1.99       | 0.019-21.57 |
| <i>Klebsiella</i>            | 2.18                                   | 305/97.1%        | 0.47       | 0-41.33     |
| <i>Methanobrevibacter</i>    | 2.09                                   | 259/82.5%        | 0.06       | 0-39.10     |
| <i>Coprococcus</i>           | 2.04                                   | 314/100.0%       | 1.44       | 0.010-18.11 |
| <i>Dorea</i>                 | 1.92                                   | 312/99.4%        | 1.44       | 0-10.09     |
| <i>Bifidobacterium</i>       | 1.89                                   | 289/92.0%        | 0.50       | 0-31.00     |
| <i>Megasphaera</i>           | 1.03                                   | 295/94.0%        | 0.06       | 0-64.18     |

172 Only the genera with more than 1% of total sequences are listed.

173

174 **Supplementary Table S4** The genus-level phylotypes showing significant differences among ethnic groups.

| Genus                        | Median, range (%)   |                     |                      |                      |                     |                      |                     | P values for the Kruskal-Wallis test | FDR      |
|------------------------------|---------------------|---------------------|----------------------|----------------------|---------------------|----------------------|---------------------|--------------------------------------|----------|
|                              | Han                 | Bai                 | Zhuang               | Kazakh               | Uyghur              | Mongol               | Tibetan             |                                      |          |
| <i>Phascolarctobacterium</i> | 4.167, 0.028-59.514 | 9.289, 0.179-53.206 | 15.790, 0.030-45.479 | 14.599, 0.293-70.388 | 5.137, 0.905-42.394 | 13.558, 0.120-64.909 | 5.623, 0.007-43.308 | 2.62E-05                             | 0.0002   |
| <i>Prevotella</i>            | 0.331, 0-30.118     | 2.012, 0.039-42.544 | 0.884, 0-51.703      | 0.143, 0.013-4.414   | 0.714, 0.044-17.648 | 0.480, 0-24.147      | 9.315, 0.008-55.915 | 3.88E-08                             | 5.39E-07 |
| <i>Bacteroides</i>           | 2.216, 0.017-29.688 | 2.387, 0.032-32.905 | 2.571, 0.083-40.821  | 4.351, 0.059-22.344  | 5.164, 0.940-16.549 | 9.215, 1.902-55.075  | 1.676, 0.022-39.640 | 4.65E-12                             | 2.04E-10 |
| <i>Blautia</i>               | 5.667, 0.124-25.810 | 3.698, 0.366-15.806 | 4.627, 0.127-16.956  | 2.583, 0.460-11.014  | 2.539, 1.012-9.325  | 3.736, 0.971-8.081   | 2.717, 0.523-15.744 | 8.23E-06                             | 7.76E-05 |
| <i>Megamonas</i>             | 0.355, 0-53.841     | 0.697, 0.028-57.009 | 0.093, 0-55.118      | 0.200, 0.034-36.760  | 0.187, 0.033-2.870  | 0.313, 0-49.860      | 0.021, 0-12.243     | 4.69E-07                             | 5.90E-06 |
| <i>Clostridium</i>           | 4.768, 0.188-17.675 | 3.706, 0.756-10.426 | 4.107, 0.159-11.427  | 2.836, 0.277-16.154  | 3.736, 1.227-9.315  | 4.245, 1.586-14.528  | 2.981, 0.445-17.030 | 0.0036                               | 0.0214   |
| <i>Ruminococcus</i>          | 2.458, 0.064-21.567 | 1.664, 0.149-10.166 | 2.878, 0.019-14.722  | 1.260, 0.046-6.951   | 1.632, 0.567-3.494  | 1.862, 0.186-6.603   | 2.352, 0.118-16.485 | 0.0085                               | 0.0460   |
| <i>Klebsiella</i>            | 0.692, 0-33.965     | 0.227, 0.010-27.626 | 0.544, 0.018-10.845  | 0.736, 0.017-33.181  | 0.836, 0.094-41.330 | 0.892, 0.004-18.971  | 0.024, 0-3.602      | 2.14E-11                             | 8.07E-10 |
| <i>Methanobrevibacter</i>    | 0.032, 0-14.588     | 0.094, 0-4.438      | 0.019, 0-39.092      | 0.900, 0.115-39.104  | 0.328, 0.027-24.187 | 0.321, 0-22.376      | 0.009, 0-35.333     | 9.18E-09                             | 1.51E-07 |
| <i>Coprococcus</i>           | 1.829, 0.010-9.251  | 1.488, 0.151-5.229  | 1.656, 0.055-18.111  | 0.964, 0.099-4.110   | 1.441, 0.544-5.767  | 1.308, 0.303-4.012   | 1.378, 0.011-10.627 | 0.0065                               | 0.0367   |
| <i>Dorea</i>                 | 2.527, 0.033-7.512  | 1.504, 0.054-5.489  | 1.541, 0-10.087      | 0.983, 0.092-3.148   | 1.483, 0.316-5.147  | 1.071, 0.075-2.887   | 0.818, 0-4.059      | 4.33E-06                             | 4.62E-05 |
| <i>Bifidobacterium</i>       | 0.409, 0-19.981     | 0.107, 0-10.564     | 0.058, 0-8.264       | 2.431, 0.063-28.788  | 1.648, 0.237-14.235 | 2.080, 0.099-30.998  | 0.296, 0-18.873     | 6.59E-17                             | 8.70E-15 |
| <i>Megasphaera</i>           | 0.046, 0-40.607     | 0.097, 0-5.100      | 0.040, 0-0.208       | 0.086, 0-5.619       | 0.265, 0-34.423     | 0.109, 0-6.391       | 0.031, 0-64.180     | 0.0009                               | 0.0062   |
| <i>Collinsella</i>           | 0.393, 0-5.299      | 0.151, 0-8.935      | 0.280, 0-5.502       | 0.701, 0.030-2.999   | 1.524, 0.019-6.337  | 0.732, 0-2.970       | 0.410, 0-6.620      | 5.24E-05                             | 0.0004   |
| <i>Anaerostipes</i>          | 0.748, 0.023-3.690  | 0.460, 0.066-1.831  | 0.478, 0.032-5.479   | 0.334, 0.025-3.216   | 0.488, 0.079-1.956  | 0.695, 0-1.661       | 0.257, 0-1.916      | 4.38E-06                             | 4.62E-05 |
| <i>Enterobacter</i>          | 0.184, 0-28.555     | 0.086, 0-3.134      | 0.168, 0-6.005       | 0.208, 0.008-9.193   | 0.273, 0.013-3.119  | 0.280, 0-1.916       | 0.006, 0-0.580      | 3.65E-13                             | 1.93E-11 |
| <i>Parasutterella</i>        | 0.036, 0-13.236     | 0.017, 0-3.752      | 0, 0-2.977           | 0.051, 0.007-5.877   | 0.065, 0-0.869      | 0.392, 0-3.199       | 0, 0-7.984          | 6.18E-15                             | 5.44E-13 |
| <i>Methanosphaera</i>        | 0, 0-9.210          | 0.018, 0-13.399     | 0, 0-17.723          | 0.187, 0.007-4.632   | 0.328, 0-10.021     | 0.069, 0-5.631       | 0, 0-4.726          | 3.05E-18                             | 8.04E-16 |
| <i>Akkermansia</i>           | 0.009, 0-11.372     | 0.013, 0-0.727      | 0.005, 0-7.456       | 0.104, 0.008-1.767   | 0.046, 0-0.559      | 0.133, 0-7.377       | 0.007, 0-40.705     | 1.11E-09                             | 2.65E-08 |
| <i>Streptococcus</i>         | 0.151, 0.007-2.228  | 0.084, 0-2.247      | 0.199, 0.018-7.815   | 0.098, 0.008-9.311   | 0.169, 0.013-8.822  | 0.175, 0-1.685       | 0.057, 0-5.458      | 0.0012                               | 0.0077   |
| <i>Veillonella</i>           | 0.127, 0-2.254      | 0.214, 0.009-3.226  | 0.284, 0.009-7.783   | 0.234, 0.030-0.750   | 0.328, 0.025-0.839  | 0.272, 0.008-0.810   | 0.153, 0.008-1.050  | 0.0028                               | 0.0175   |
| <i>Kluyvera</i>              | 0.052, 0-13.616     | 0.009, 0-2.199      | 0.031, 0-2.157       | 0.051, 0.013-1.210   | 0.115, 0-3.373      | 0.085, 0-2.045       | 0, 0-0.307          | 6.00E-11                             | 1.98E-09 |
| <i>Shigella</i>              | 0.157, 0-2.289      | 0.065, 0-1.709      | 0.093, 0-1.229       | 0.118, 0-1.029       | 0.145, 0.013-4.306  | 0.209, 0-1.111       | 0.027, 0-0.381      | 1.02E-07                             | 1.35E-06 |
| <i>Acidaminococcus</i>       | 0.006, 0-9.978      | 0.014, 0-13.200     | 0.007, 0-6.330       | 0.008, 0-5.265       | 0.011, 0-5.329      | 0.012, 0-0.613       | 0, 0-0.101          | 7.09E-06                             | 6.93E-05 |
| <i>Sporobacterium</i>        | 0.211, 0.005-1.230  | 0.158, 0.009-1.098  | 0.192, 0-1.521       | 0.097, 0.007-0.356   | 0.133, 0.050-0.498  | 0.161, 0-0.338       | 0.105, 0-0.885      | 6.53E-05                             | 0.0005   |
| <i>Butyrivococcus</i>        | 0.159, 0-2.294      | 0.150, 0-0.621      | 0.216, 0-1.112       | 0.074, 0-0.862       | 0.103, 0.022-0.246  | 0.123, 0.014-0.628   | 0.047, 0-0.382      | 5.86E-09                             | 1.10E-07 |
| <i>Hespellia</i>             | 0.155, 0-1.341      | 0.100, 0-1.253      | 0.116, 0.012-2.872   | 0.083, 0-0.313       | 0.092, 0.023-0.418  | 0.148, 0.008-0.353   | 0.076, 0-0.414      | 0.0082                               | 0.0451   |
| <i>Lactobacillus</i>         | 0.008, 0-13.712     | 0.010, 0-0.494      | 0, 0-1.204           | 0.056, 0-2.842       | 0.054, 0-2.935      | 0.025, 0-0.848       | 0.035, 0-1.488      | 7.49E-09                             | 1.32E-07 |
| <i>Oscillibacter</i>         | 0.027, 0-1.836      | 0.047, 0-0.267      | 0.098, 0-0.755       | 0.092, 0-0.546       | 0.096, 0-0.890      | 0.095, 0-1.143       | 0.194, 0-3.027      | 1.46E-08                             | 2.26E-07 |

|                         |                 |                |                |                 |                    |                    |                |          |          |
|-------------------------|-----------------|----------------|----------------|-----------------|--------------------|--------------------|----------------|----------|----------|
| <i>Robinsoniella</i>    | 0.035, 0-2.051  | 0.100, 0-1.621 | 0.030, 0-3.549 | 0.017, 0-0.440  | 0.029, 0-0.535     | 0.082, 0-1.246     | 0.022, 0-0.406 | 6.49E-07 | 7.78E-06 |
| <i>Mitsuokella</i>      | 0, 0-0.810      | 0, 0-2.834     | 0, 0-0.220     | 0.003, 0-11.510 | 0.033, 0-11.853    | 0, 0-0.132         | 0, 0-10.968    | 1.24E-05 | 0.0001   |
| <i>Cedecea</i>          | 0.020, 0-4.244  | 0.010, 0-0.335 | 0.044, 0-1.947 | 0.020, 0-0.454  | 0.038, 0-0.373     | 0.024, 0-0.655     | 0, 0-0.124     | 3.83E-08 | 5.39E-07 |
| <i>Propionispora</i>    | 0.011, 0-18.989 | 0.017, 0-0.227 | 0.021, 0-1.276 | 0.040, 0-0.163  | 0.023, 0-0.100     | 0.033, 0-11.591    | 0.011, 0-0.085 | 0.0016   | 0.0099   |
| <i>Enterococcus</i>     | 0.007, 0-4.374  | 0, 0-0.296     | 0, 0-3.647     | 0, 0-0.033      | 0.010, 0-0.077     | 0.020, 0-8.791     | 0, 0-1.120     | 5.63E-05 | 0.0004   |
| <i>Dialister</i>        | 0.005, 0-0.874  | 0.008, 0-0.702 | 0, 0-1.021     | 0.010, 0-8.126  | 0.069, 0-4.544     | 0.012, 0-0.172     | 0.009, 0-1.515 | 0.0003   | 0.0019   |
| <i>Sutterella</i>       | 0, 0-0.837      | 0.018, 0-1.043 | 0, 0-1.684     | 0, 0-0.427      | 0.021, 0-0.737     | 0.012, 0-3.836     | 0.023, 0-1.107 | 7.16E-07 | 8.21E-06 |
| <i>Giesbergiera</i>     | 0, 0-0.032      | 0, 0-0.087     | 0, 0-10.608    | 0.004, 0-0.213  | 0.008, 0-1.150     | 0.003, 0-0.517     | 0, 0-0.359     | 2.37E-10 | 6.26E-09 |
| <i>Lactonifactor</i>    | 0.037, 0-2.723  | 0.048, 0-1.967 | 0.029, 0-3.354 | 0.017, 0-0.598  | 0.031, 0-0.067     | 0.025, 0-0.702     | 0.014, 0-0.325 | 0.0009   | 0.0061   |
| <i>Howardella</i>       | 0.048, 0-0.637  | 0.058, 0-1.414 | 0.033, 0-0.575 | 0.018, 0-0.079  | 0.040, 0-0.152     | 0.059, 0-2.147     | 0.037, 0-0.286 | 0.0058   | 0.0330   |
| <i>Asaccharobacter</i>  | 0.063, 0-0.678  | 0.035, 0-0.305 | 0.059, 0-0.422 | 0.056, 0-0.286  | 0.085, 0.008-0.962 | 0.068, 0-0.535     | 0.028, 0-0.378 | 8.16E-05 | 0.0006   |
| <i>Erwinia</i>          | 0.062, 0-1.276  | 0.039, 0-0.621 | 0.028, 0-0.597 | 0.076, 0-0.458  | 0.075, 0-0.461     | 0.062, 0-0.531     | 0.007, 0-0.075 | 1.04E-10 | 3.06E-09 |
| <i>Papillibacter</i>    | 0.018, 0-0.545  | 0.015, 0-0.181 | 0.025, 0-0.521 | 0.030, 0-0.348  | 0.055, 0-0.593     | 0.047, 0-0.386     | 0.125, 0-1.535 | 4.89E-06 | 4.96E-05 |
| <i>Moryella</i>         | 0.069, 0-0.459  | 0.039, 0-0.218 | 0.013, 0-0.464 | 0.034, 0-0.120  | 0.046, 0.005-0.344 | 0.054, 0-0.200     | 0.018, 0-0.280 | 1.75E-05 | 0.0001   |
| <i>Desulfovibrio</i>    | 0, 0-0.814      | 0.004, 0-0.139 | 0.022, 0-0.548 | 0.009, 0-0.379  | 0.091, 0-3.224     | 0.008, 0-0.536     | 0, 0-0.731     | 9.50E-06 | 8.64E-05 |
| <i>Methanobacterium</i> | 0, 0-1.120      | 0, 0-0.460     | 0, 0-0.912     | 0.038, 0-1.614  | 0.041, 0-2.428     | 0.019, 0-0.711     | 0, 0-0.840     | 1.26E-13 | 8.32E-12 |
| <i>Anaerosinus</i>      | 0.012, 0-2.209  | 0.014, 0-0.833 | 0, 0-0.950     | 0.007, 0-0.707  | 0.010, 0-0.161     | 0.008, 0-0.126     | 0, 0-0.145     | 0.0048   | 0.0279   |
| <i>Xylanibacter</i>     | 0.012, 0-0.972  | 0.021, 0-1.269 | 0.006, 0-0.653 | 0, 0-0.136      | 0.022, 0-0.136     | 0.012, 0-0.200     | 0.059, 0-0.775 | 0.0001   | 0.0007   |
| <i>Bilophila</i>        | 0.011, 0-0.529  | 0.011, 0-0.236 | 0.028, 0-0.592 | 0.024, 0-0.379  | 0.018, 0-0.387     | 0.093, 0.003-0.934 | 0.023, 0-0.187 | 1.21E-09 | 2.65E-08 |
| <i>Slackia</i>          | 0.003, 0-0.477  | 0.004, 0-0.165 | 0.009, 0-1.542 | 0.061, 0-0.332  | 0.169, 0-0.882     | 0.012, 0-0.259     | 0.037, 0-0.707 | 1.33E-09 | 2.69E-08 |

175 Only the genera representing more than 0.05% of the total sequences are included for comparison. Both the unadjusted  $P$  values ( $P < 0.01$ ) for  
176 the Kruskal-Wallis test and the FDR values are listed.

177



178 **Supplementary Table S5** The genus-level phylotypes showing significant differences between 169  
 179 rural and 145 urban individuals.

| Genus                     | Median, range (%)   |                     | <i>P</i> values for the Kruskal-Wallis test | FDR    |
|---------------------------|---------------------|---------------------|---------------------------------------------|--------|
|                           | Rural               | Urban               |                                             |        |
| <i>Methanobacterium</i>   | 0, 0-2.428          | 0, 0-0.912          | 0.0064                                      | 0.2126 |
| <i>Methanobrevibacter</i> | 0.106, 0-35.333     | 0.041, 0-39.104     | 0.0086                                      | 0.2509 |
| <i>Methanosphaera</i>     | 0.014, 0-13.399     | 0, 0-17.723         | 0.0023                                      | 0.1461 |
| <i>Prevotella</i>         | 1.861, 0-55.915     | 0.231, 0-51.728     | 5.79E-07                                    | 0.0002 |
| <i>Xylanibacter</i>       | 0.028, 0-0.972      | 0.005, 0-1.269      | 2.16E-05                                    | 0.0029 |
| <i>Megasphaera</i>        | 0.084, 0-64.180     | 0.049, 0-7.091      | 0.0054                                      | 0.2048 |
| <i>Blautia</i>            | 3.552, 0.124-19.387 | 4.290, 0.460-25.810 | 0.0030                                      | 0.1461 |
| <i>Anaerostipes</i>       | 0.487, 0-3.690      | 0.669, 0-5.479      | 0.0005                                      | 0.0400 |
| <i>Butyricoccus</i>       | 0.106, 0-2.294      | 0.158, 0-1.170      | 0.0033                                      | 0.1461 |

180 Only the genera representing more than 0.05% of the total sequences are included for comparison.

181 Both the unadjusted *P* values ( $P < 0.01$ ) for the Kruskal-Wallis test and the FDR values are listed.

182

183

184 **Supplementary Table S6** The genus-level phylotypes showing significant differences between 26  
 185 rural and 22 urban Mongol individuals.

| Genus                     | Median, range (%)   |                    | <i>P</i> values for the Kruskal-Wallis test | FDR      |
|---------------------------|---------------------|--------------------|---------------------------------------------|----------|
|                           | Rural Mongolian     | Urban Mongolian    |                                             |          |
| <i>Prevotella</i>         | 1.982, 0.042-20.613 | 0.030, 0-24.147    | 3.55E-06                                    | 0.0002   |
| <i>Megamonas</i>          | 0.660, 0.067-5.891  | 0.028, 0-49.860    | 6.41E-05                                    | 0.0017   |
| <i>Methanobrevibacter</i> | 2.080, 0.021-10.619 | 0.019, 0-22.376    | 5.20E-06                                    | 0.0002   |
| <i>Megasphaera</i>        | 0.552, 0.015-1.512  | 0.064, 0-6.391     | 0.0005                                      | 0.0069   |
| <i>Methanosphaera</i>     | 0.368, 0.003-5.631  | 0, 0-1.111         | 6.01E-08                                    | 1.33E-05 |
| <i>Akkermansia</i>        | 0.218, 0.015-6.722  | 0.017, 0-7.377     | 0.0040                                      | 0.0421   |
| <i>Streptococcus</i>      | 0.220, 0.029-0.593  | 0.065, 0-1.685     | 0.0035                                      | 0.0388   |
| <i>Veillonella</i>        | 0.420, 0.048-0.810  | 0.191, 0.008-0.773 | 0.0002                                      | 0.0029   |
| <i>Acidaminococcus</i>    | 0.091, 0-0.613      | 0.008, 0-0.050     | 0.0001                                      | 0.0024   |
| <i>Butyrivococcus</i>     | 0.082, 0.014-0.195  | 0.238, 0.015-0.628 | 0.0002                                      | 0.0038   |
| <i>Lactobacillus</i>      | 0.056, 0-0.848      | 0.006, 0-0.065     | 3.14E-05                                    | 0.0009   |
| <i>Oscillibacter</i>      | 0.173, 0.007-1.143  | 0.046, 0-0.877     | 0.0010                                      | 0.0132   |
| <i>Mitsuokella</i>        | 0.017, 0-0.132      | 0, 0-0.010         | 0.0002                                      | 0.0029   |
| <i>Sporomusa</i>          | 0.018, 0-0.182      | 0, 0-0.059         | 0.0020                                      | 0.0239   |
| <i>Propionispora</i>      | 0.052, 0-11.591     | 0.014, 0-0.140     | 0.0011                                      | 0.0133   |
| <i>Enterococcus</i>       | 0.041, 0-8.791      | 0, 0-0.621         | 0.0009                                      | 0.0124   |
| <i>Dialister</i>          | 0.040, 0-0.172      | 0, 0-0.064         | 7.89E-06                                    | 0.0003   |
| <i>Sutterella</i>         | 0.032, 0-3.836      | 0, 0-1.474         | 0.0095                                      | 0.0928   |
| <i>Giesbergia</i>         | 0.022, 0-0.184      | 0, 0-0.517         | 0.0022                                      | 0.0251   |
| <i>Lactonifactor</i>      | 0.049, 0.012-0.702  | 0.002, 0-0.112     | 1.52E-06                                    | 0.0001   |
| <i>Erwinia</i>            | 0.155, 0-0.517      | 0.034, 0-0.531     | 0.0055                                      | 0.0560   |
| <i>Papillibacter</i>      | 0.086, 0.007-0.386  | 0.011, 0-0.384     | 8.24E-05                                    | 0.0020   |
| <i>Desulfovibrio</i>      | 0.031, 0-0.536      | 0, 0-0.441         | 0.0004                                      | 0.0056   |
| <i>Methanobacterium</i>   | 0.136, 0-0.711      | 0, 0-0.049         | 1.01E-07                                    | 1.33E-05 |
| <i>Anaerosinus</i>        | 0.026, 0-0.126      | 0, 0-0.036         | 4.84E-06                                    | 0.0002   |
| <i>Xylanibacter</i>       | 0.060, 0-0.200      | 0, 0-0.171         | 6.97E-07                                    | 6.13E-05 |
| <i>Slackia</i>            | 0.024, 0-0.076      | 0, 0-0.259         | 0.0001                                      | 0.0024   |

186 Only the genera representing more than 0.05% of the total sequences are included for comparison.

187 Both the unadjusted *P* values ( $P < 0.01$ ) for the Kruskal-Wallis test and the FDR values are listed.

188

189

190 **Supplementary Table S7** The 30 most prevalent OTUs identified in this study.

| OTU ID   | Phylum                | Genus                               | Prevalence (n/%) | Proportion in total used sequences (%) |
|----------|-----------------------|-------------------------------------|------------------|----------------------------------------|
| OTU61903 | <i>Actinobacteria</i> | <i>Collinsella</i>                  | 288/91.7%        | 0.671%                                 |
| OTU69950 | <i>Firmicutes</i>     | <i>Blautia</i>                      | 288/91.7%        | 0.099%                                 |
| OTU51265 | <i>Firmicutes</i>     | <i>Blautia</i>                      | 302/96.2%        | 0.262%                                 |
| OTU62767 | <i>Firmicutes</i>     | <i>Blautia</i>                      | 302/96.2%        | 0.355%                                 |
| OTU53704 | <i>Firmicutes</i>     | <i>Blautia</i>                      | 304/96.8%        | 0.430%                                 |
| OTU83797 | <i>Firmicutes</i>     | <i>Clostridium</i>                  | 295/93.9%        | 0.401%                                 |
| OTU88919 | <i>Firmicutes</i>     | <i>Clostridium</i>                  | 302/96.2%        | 0.446%                                 |
| OTU43582 | <i>Firmicutes</i>     | <i>Coprococcus</i>                  | 296/94.3%        | 0.862%                                 |
| OTU42758 | <i>Firmicutes</i>     | <i>Dorea</i>                        | 283/90.1%        | 0.058%                                 |
| OTU1142  | <i>Firmicutes</i>     | <i>Dorea</i>                        | 290/92.4%        | 0.072%                                 |
| OTU89633 | <i>Firmicutes</i>     | <i>Dorea</i>                        | 302/96.2%        | 0.316%                                 |
| OTU51442 | <i>Firmicutes</i>     | <i>Dorea</i>                        | 303/96.5%        | 0.597%                                 |
| OTU97220 | <i>Firmicutes</i>     | <i>Faecalibacterium</i>             | 288/91.7%        | 0.374%                                 |
| OTU71777 | <i>Firmicutes</i>     | <i>Faecalibacterium</i>             | 289/92.0%        | 0.602%                                 |
| OTU41732 | <i>Firmicutes</i>     | <i>Faecalibacterium</i>             | 297/94.6%        | 0.313%                                 |
| OTU70817 | <i>Firmicutes</i>     | <i>Faecalibacterium</i>             | 306/97.5%        | 0.785%                                 |
| OTU8392  | <i>Firmicutes</i>     | <i>Phascolarctobacterium</i>        | 284/90.4%        | 5.136%                                 |
| OTU59189 | <i>Firmicutes</i>     | <i>Roseburia</i>                    | 288/91.7%        | 0.405%                                 |
| OTU64386 | <i>Firmicutes</i>     | <i>Roseburia</i>                    | 294/93.6%        | 1.619%                                 |
| OTU83535 | <i>Firmicutes</i>     | <i>Ruminococcus</i>                 | 287/91.4%        | 0.161%                                 |
| OTU69346 | <i>Firmicutes</i>     | <i>Subdoligranulum</i>              | 295/93.9%        | 0.477%                                 |
| OTU14239 | <i>Firmicutes</i>     | <i>Subdoligranulum</i>              | 304/96.8%        | 0.869%                                 |
| OTU33494 | <i>Firmicutes</i>     | Unclassified <i>Clostridiaceae</i>  | 293/93.3%        | 0.250%                                 |
| OTU80072 | <i>Firmicutes</i>     | Unclassified <i>Clostridiaceae</i>  | 299/95.2%        | 0.378%                                 |
| OTU18105 | <i>Firmicutes</i>     | Unclassified <i>Clostridiaceae</i>  | 300/95.5%        | 0.222%                                 |
| OTU61228 | <i>Firmicutes</i>     | Unclassified <i>Clostridiaceae</i>  | 301/95.9%        | 0.194%                                 |
| OTU554   | <i>Firmicutes</i>     | Unclassified <i>Clostridiaceae</i>  | 301/95.9%        | 0.522%                                 |
| OTU55587 | <i>Firmicutes</i>     | Unclassified <i>Lachnospiraceae</i> | 287/91.4%        | 0.203%                                 |
| OTU69334 | <i>Firmicutes</i>     | Unclassified <i>Firmicutes</i>      | 287/91.4%        | 0.182%                                 |
| OTU75613 | <i>Proteobacteria</i> | <i>Klebsiella</i>                   | 301/95.9%        | 1.759%                                 |

191

192

193 **Supplementary References**

194 Bureau of Statistics of Heilongjiang, Survey Office of the National Bureau of Statistics in  
195 Heilongjiang (2012). *Heilongjiang Statistical Yearbook*. China Statistics Press.

196

197 Bureau of Statistics of Henan, Survey Office of the National Bureau of Statistics in Henan (2012).  
198 *Henan Statistical Yearbook*. China Statistics Press.

199

200 Bureau of Statistics of Jiangsu, Survey Office of the National Bureau of Statistics in Jiangsu (2012).  
201 *Jiangsu Statistical Yearbook*. China Statistics Press.

202

203 Bureau of Statistics of Sichuan, Survey Office of the National Bureau of Statistics in Sichuan (2012).  
204 *Sichuan Statistical Yearbook*. China Statistics Press.

205

206 Caporaso JG, Bittinger K, Bushman FD, DeSantis TZ, Andersen GL, Knight R (2010). PyNAST: a  
207 flexible tool for aligning sequences to a template alignment. *Bioinformatics* **26**: 266-267.

208

209 Cole JR, Chai B, Farris RJ, Wang Q, Kulam-Syed-Mohideen AS, McGarrell DM *et al* (2007). The  
210 ribosomal database project (RDP-II): introducing myRDP space and quality controlled public data.  
211 *Nucleic Acids Res* **35**: D169-D172.

212

213 Dethlefsen L, Relman DA (2011). Incomplete recovery and individualized responses of the human  
214 distal gut microbiota to repeated antibiotic perturbation. *Proc Natl Acad Sci U S A* **108**: 4554-4561.

215

216 Dot TD, Osawa R, Stackebrandt E (1993). *Phascolarctobacterium faecium* gen. nov, spec. nov., a  
217 novel taxon of the *Sporomusa* group of *Bacteria*. *Syst Appl Microbiol* **16**: 380-384.

218

219 Edgar RC (2010). Search and clustering orders of magnitude faster than BLAST. *Bioinformatics* **26**:  
220 2460-2461.

221

222 Haas BJ, Gevers D, Earl AM, Feldgarden M, Ward DV, Giannoukos G *et al* (2011). Chimeric 16S  
223 rRNA sequence formation and detection in Sanger and 454-pyrosequenced PCR amplicons. *Genome*  
224 *Res* **21**: 494-504.

225

226 Lee OO, Wang Y, Yang JK, Lafi FF, Al-Suwailem A, Qian PY (2011). Pyrosequencing reveals highly  
227 diverse and species-specific microbial communities in sponges from the Red Sea. *Isme J* **5**: 650-664.

228

229 Lozupone C, Knight R (2005). UniFrac: a new phylogenetic method for comparing microbial  
230 communities. *Appl Environ Microbiol* **71**: 8228-8235.

231

232 Lozupone CA, Hamady M, Kelley ST, Knight R (2007). Quantitative and qualitative beta diversity  
233 measures lead to different insights into factors that structure microbial communities. *Appl Environ*  
234 *Microbiol* **73**: 1576-1585.

235

236 Price MN, Dehal PS, Arkin AP (2009). FastTree: computing large minimum evolution trees with  
237 profiles instead of a distance matrix. *Mol Biol Evol* **26**: 1641-1650.

238

239 Shah HN, Collins MD (1989). Proposal to restrict the genus *Bacteroides* (Castellani and Chalmers)  
240 to *Bacteroides fragilis* and closely related species. *Int J Syst Bacteriol* **39**: 85-87.

241

242 Shah HN, Collins DM (1990). *Prevotella*, a new genus to include *Bacteroides melaninogenicus* and

243 related species formerly classified in the genus *Bacteroides*. *Int J Syst Bacteriol* **40**: 205-208.  
244  
245 Watanabe Y, Nagai F, Morotomi M (2012). Characterization of *Phascolarctobacterium succinatutens*  
246 sp. nov., an asaccharolytic, succinate-utilizing bacterium isolated from human feces. *Appl Environ*  
247 *Microbiol* **78**: 511-518.  
248
